# Supplementary material for: Ethylene polymerization by salicylaldimine nickel(ii) complexes containing a dibenzhydryl moiety
Source: Royal Society of Chemistry journal article supplement (doi:10.1039/c5dt04408a), 2015-12-08
Supplement: c5dt04408a1.pdf [file c5dt04408a1.pdf]

**Supporting Information for:**  
**Ethylene Polymerization by Salicylaldimine Nickel(II)**  
**Complexes Containing Dibenzhydryl Moiety**

Xiaohui Hu, Shengyu Dai, Changle Chen\*

*CAS Key Laboratory of Soft Matter Chemistry, and Department of Polymer Science and Engineering, University of Science and Technology of China, Hefei, 230026, China*

\*To whom correspondence should be addressed. Telephone: +86-551-63601495. E-mail: [changle@ustc.edu.cn](mailto:changle@ustc.edu.cn)

**Content**

|                                                                                               |     |
|-----------------------------------------------------------------------------------------------|-----|
| <sup>1</sup> H NMR, <sup>13</sup> C NMR, <sup>19</sup> F NMR of the ligands. ....             | S2  |
| <sup>1</sup> H NMR, <sup>13</sup> C NMR, <sup>31</sup> P NMR of the Nickel(II) Complexes..... | S5  |
| <sup>1</sup> H NMR, <sup>13</sup> C NMR of the Polyethylene.....                              | S11 |
| DSC of Polyethylene generated by precatalyst 4.....                                           | S21 |
| X-Ray Crystallography of complex 1 and 2. ....                                                | S21 |

**$^1\text{H}$  NMR,  $^{13}\text{C}$  NMR,  $^{31}\text{P}$  NMR of the ligands.**

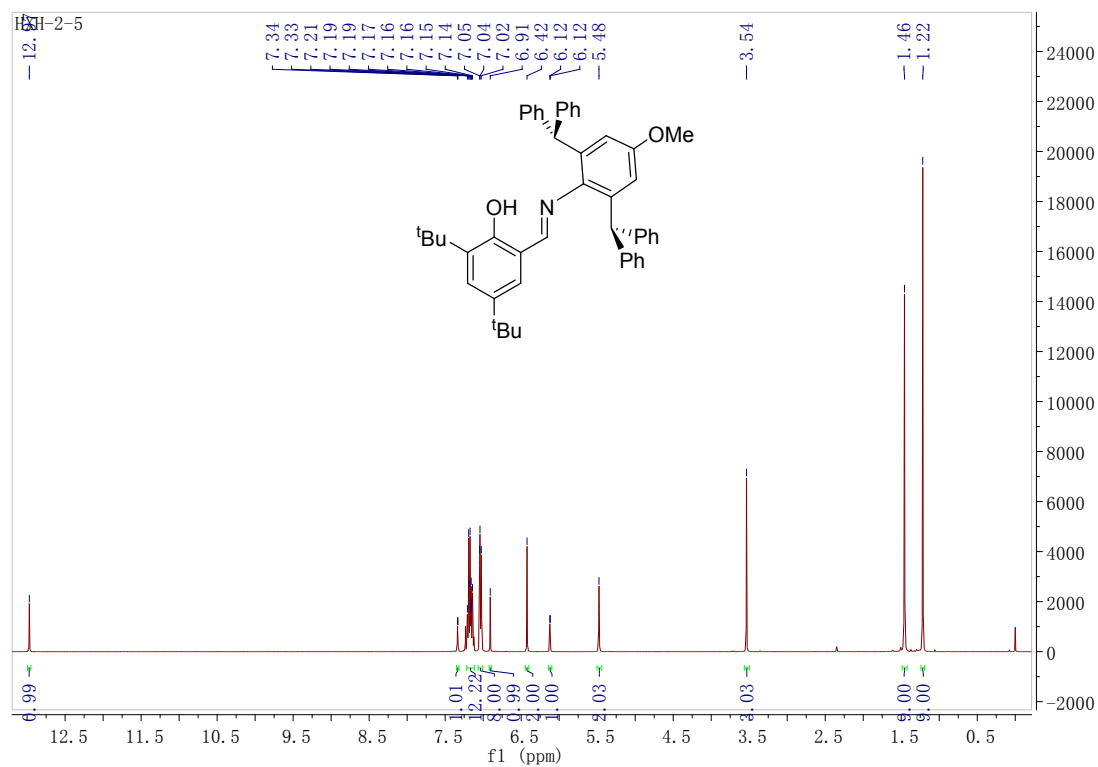

**Figure S1.**  $^1\text{H}$  NMR spectrum (400 MHz,  $\text{CDCl}_3$ , ppm) of  $\text{L}_1$ .

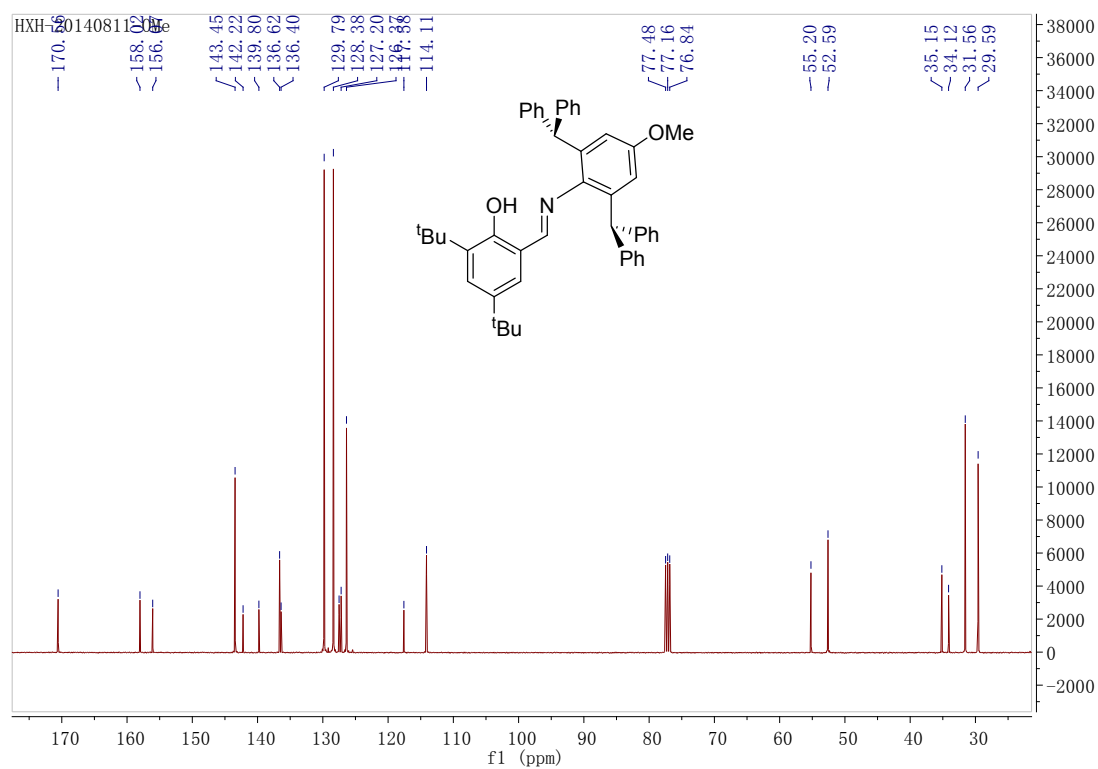

**Figure S2.**  $^{13}\text{C}$  NMR spectrum (100 MHz,  $\text{CDCl}_3$ , ppm) of  $\text{L}_1$ .

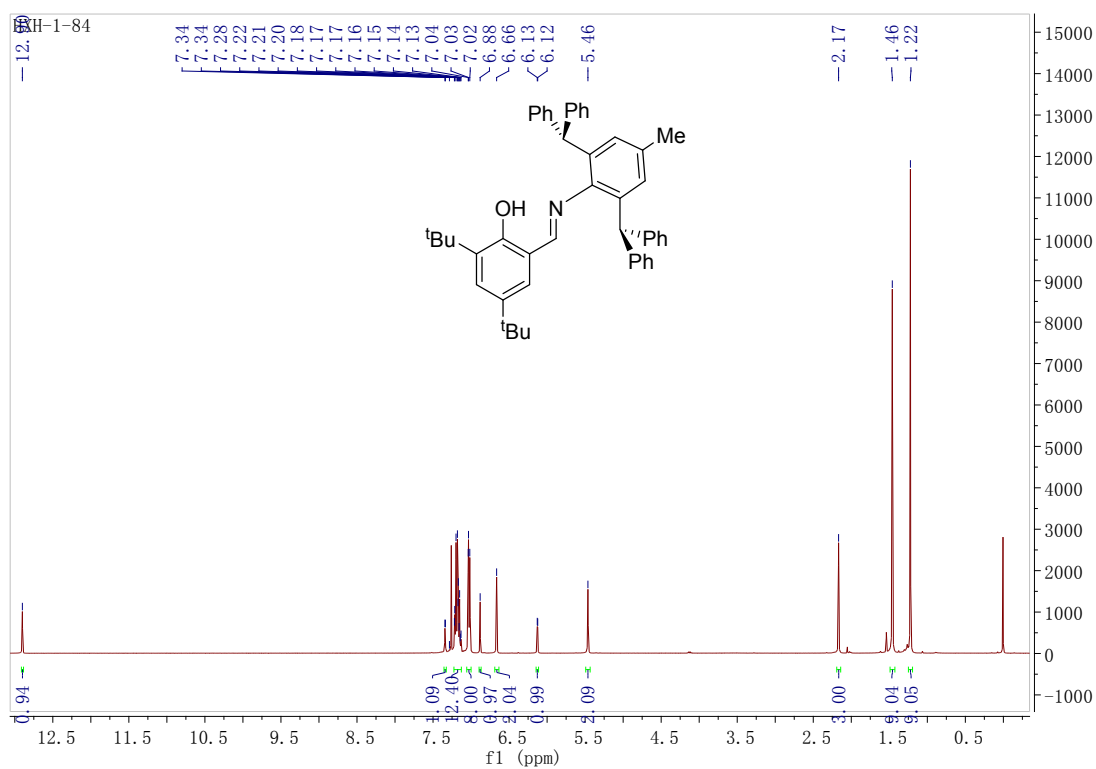

**Figure S3.**  $^1\text{H}$  NMR spectrum (400 MHz,  $\text{CDCl}_3$ , ppm) of  $\text{L}_2$ .

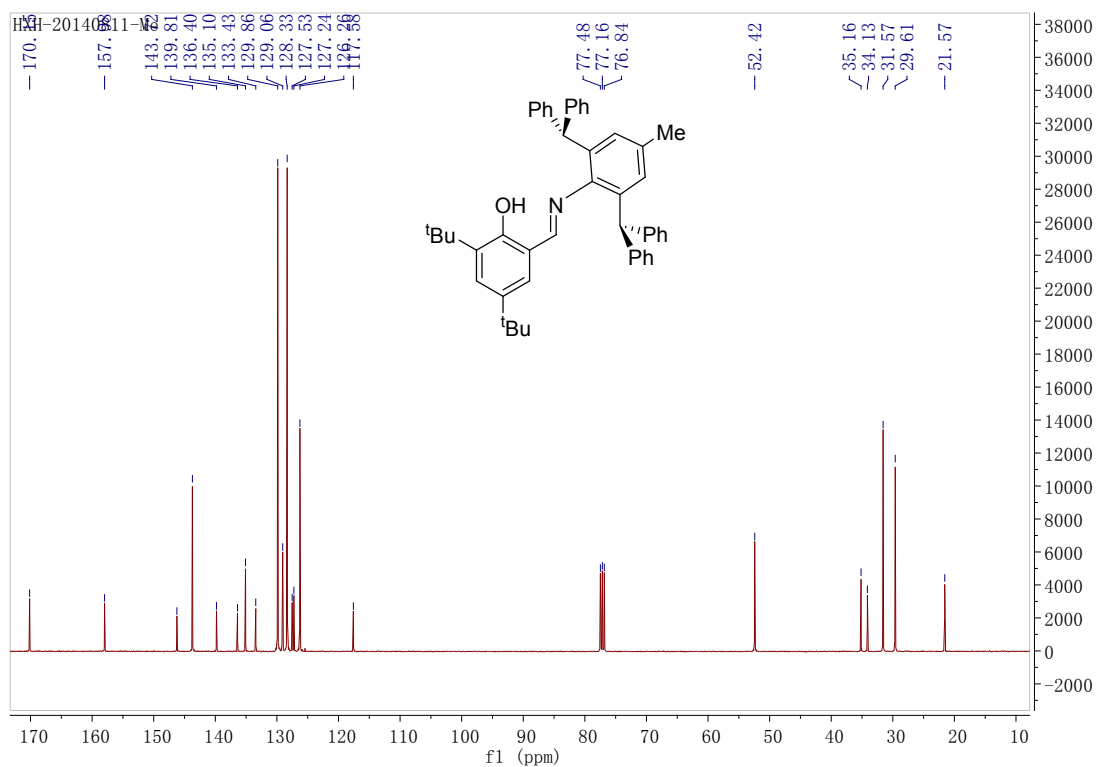

**Figure S4.**  $^{13}\text{C}$  NMR spectrum (100 MHz,  $\text{CDCl}_3$ , ppm) of  $\text{L}_2$ .

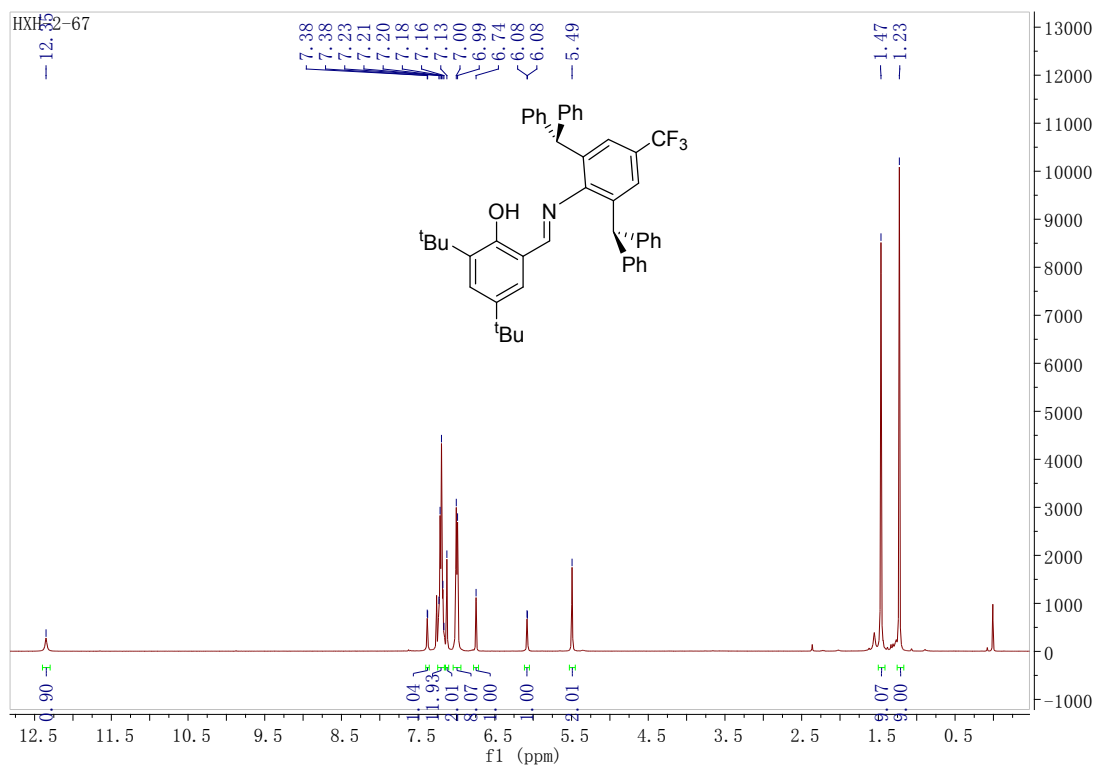

**Figure S5.**  $^1\text{H}$  NMR spectrum (400 MHz,  $\text{CDCl}_3$ , ppm) of **L4**.

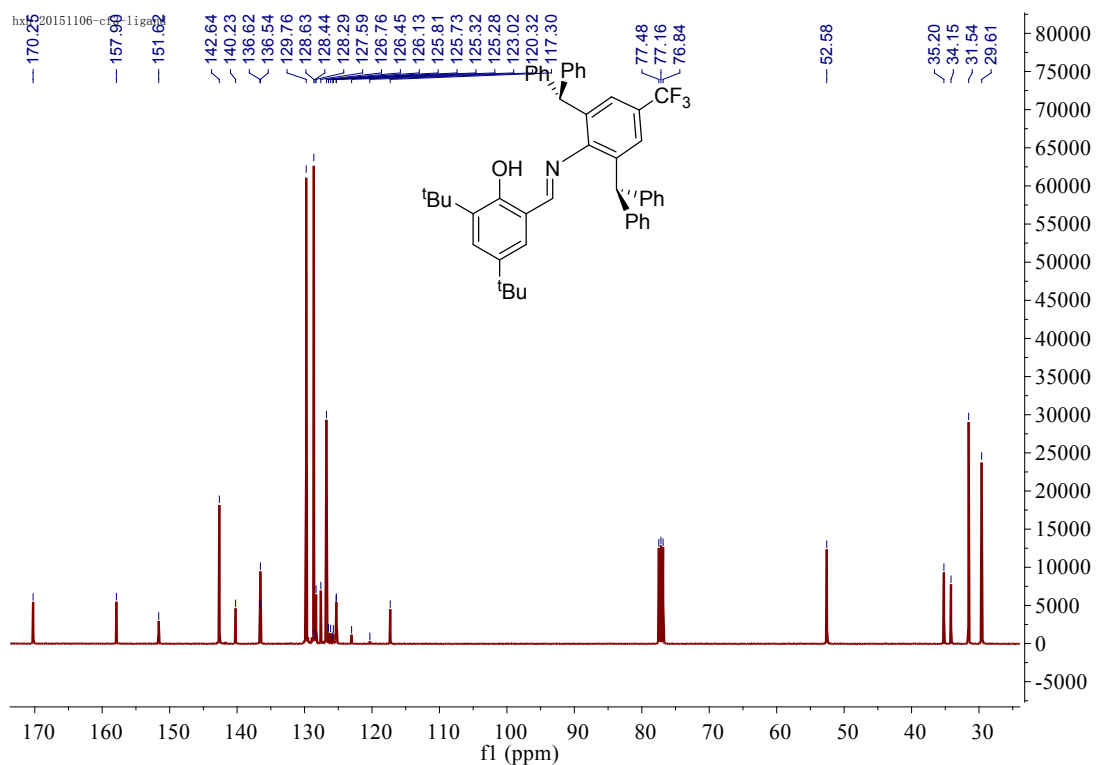

**Figure S6.**  $^{13}\text{C}$  NMR spectrum (100 MHz,  $\text{CDCl}_3$ , ppm) of **L4**.

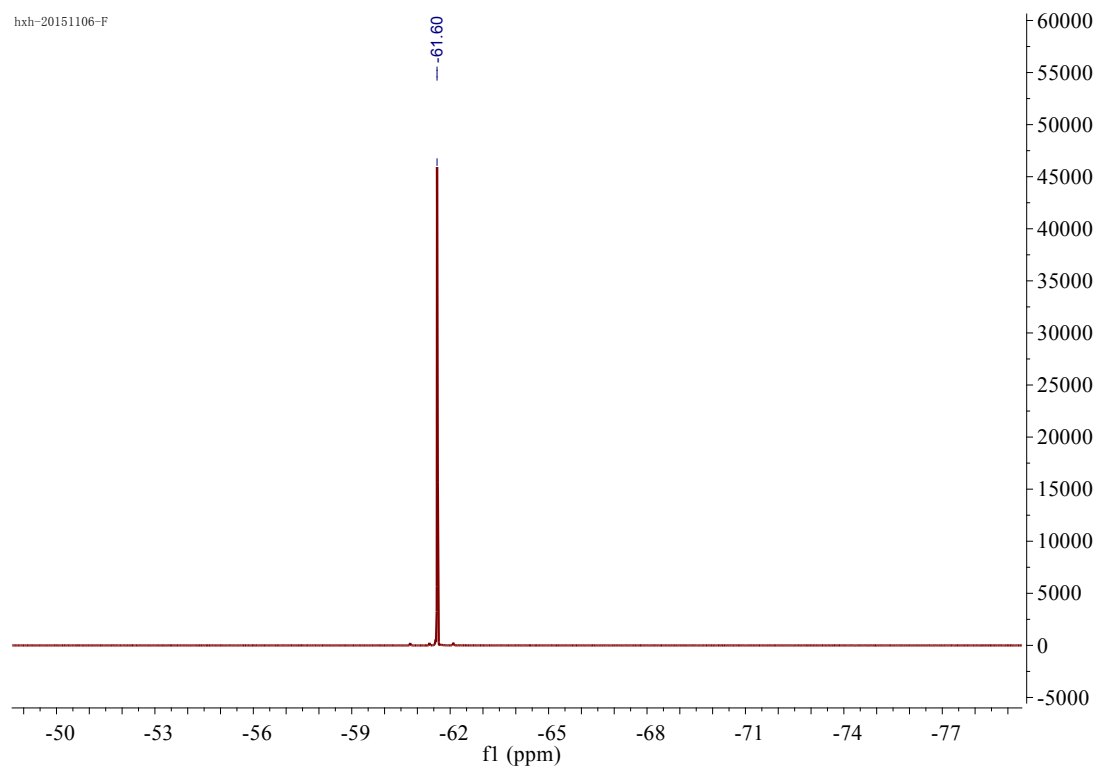

**Figure S7.**  $^{19}\text{F}$  NMR spectrum (282 MHz,  $\text{CDCl}_3$ , ppm) of **L4**.

**$^1\text{H}$  NMR,  $^{13}\text{C}$  NMR,  $^{31}\text{P}$  NMR of the Nickel(II) Complexes.**

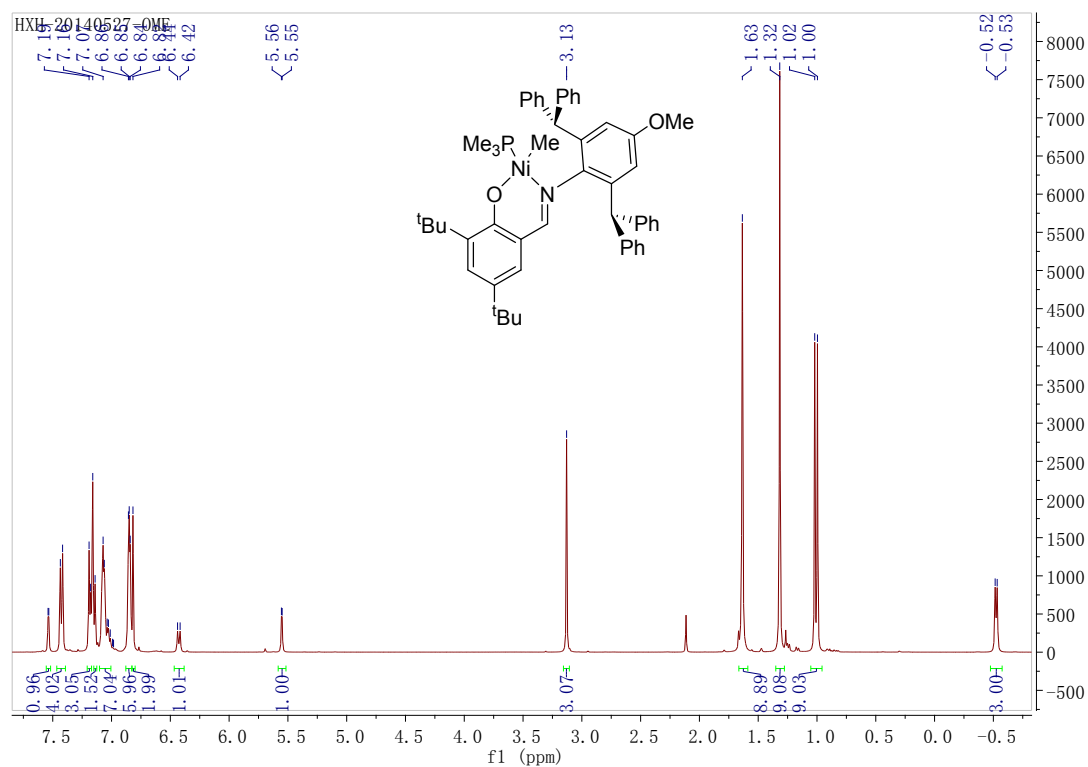

**Figure S8.**  $^1\text{H}$  NMR spectrum (400 MHz,  $\text{C}_6\text{D}_6$ , ppm) of **1**.

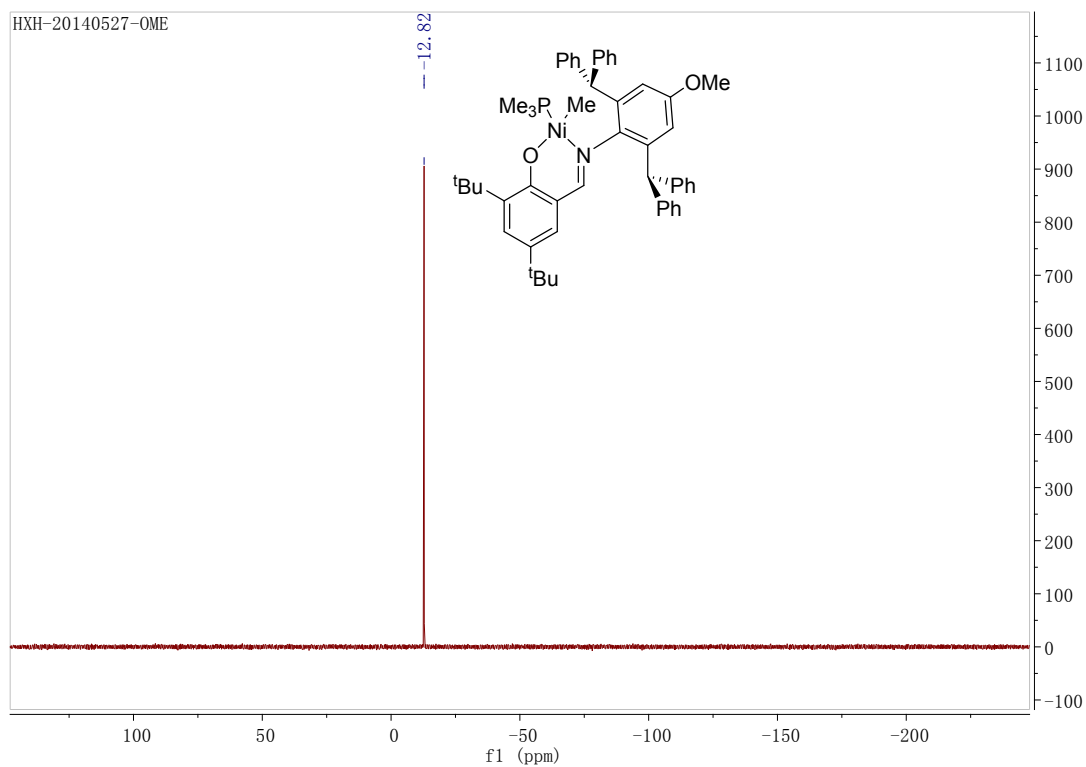

**Figure S9.**  $^{31}\text{P}$  NMR spectrum (162 MHz,  $\text{C}_6\text{D}_6$ , ppm) of **1**.

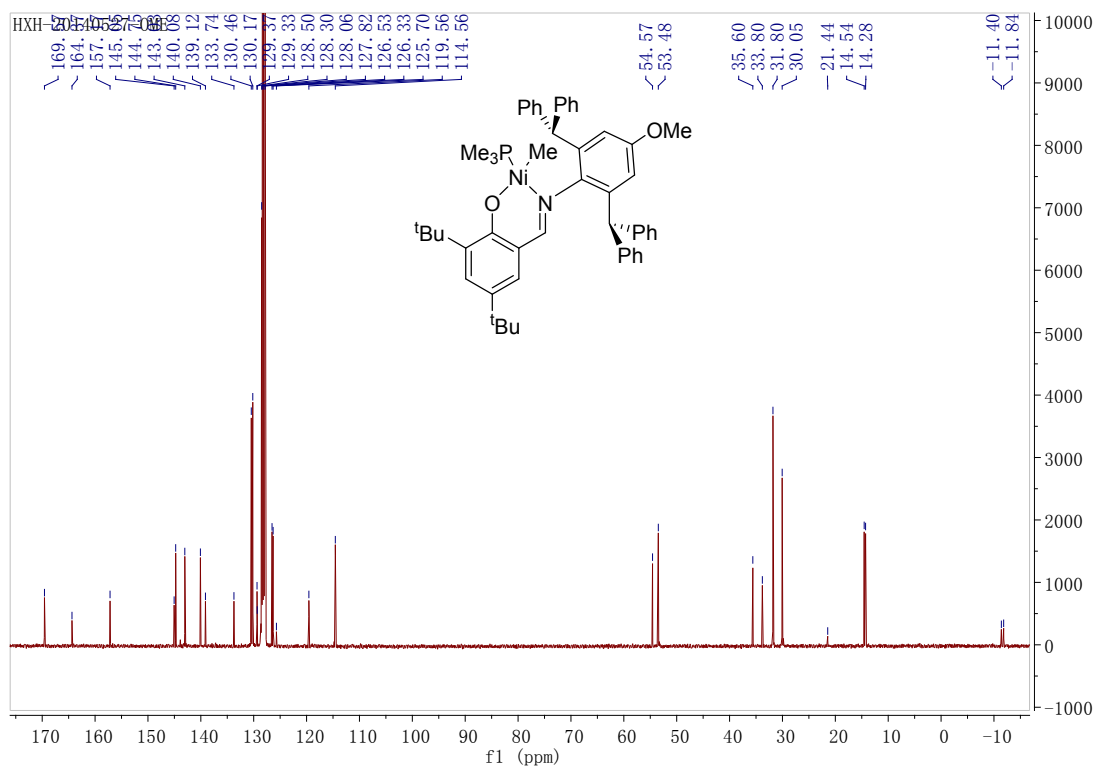

**Figure S10.**  $^{13}\text{C}$  NMR spectrum (100 MHz,  $\text{C}_6\text{D}_6$ , ppm) of **1**.

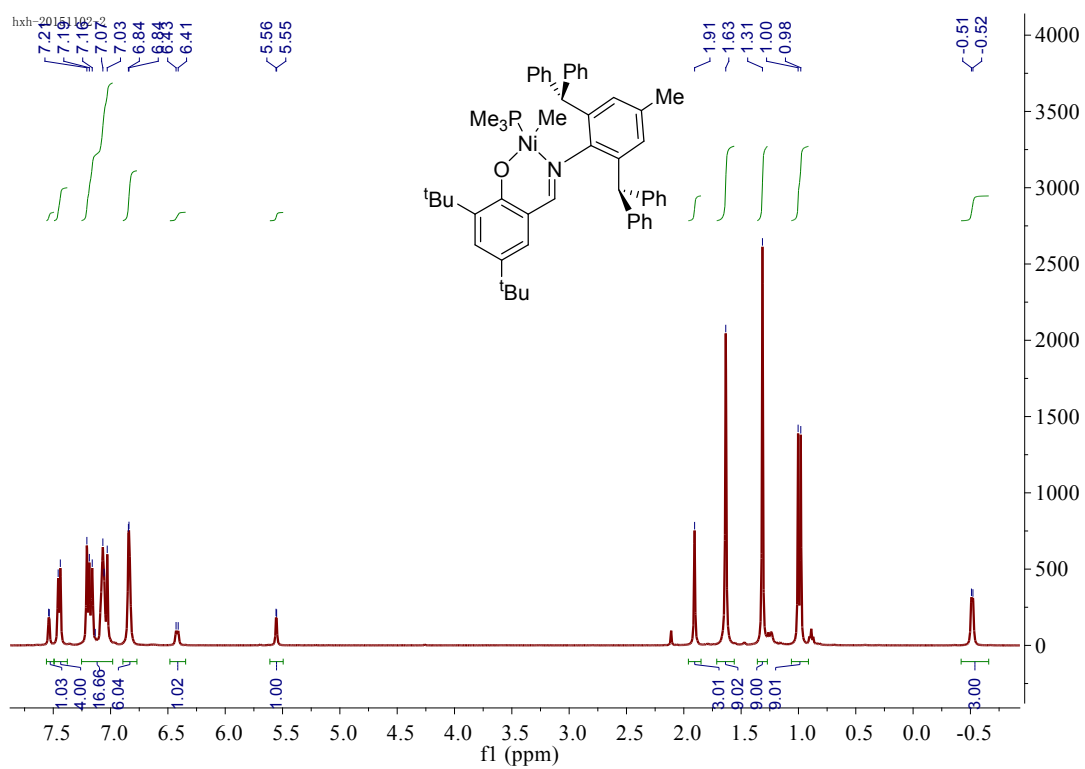

**Figure S11.** <sup>1</sup>H NMR spectrum (400 MHz, C<sub>6</sub>D<sub>6</sub>, ppm) of 2.

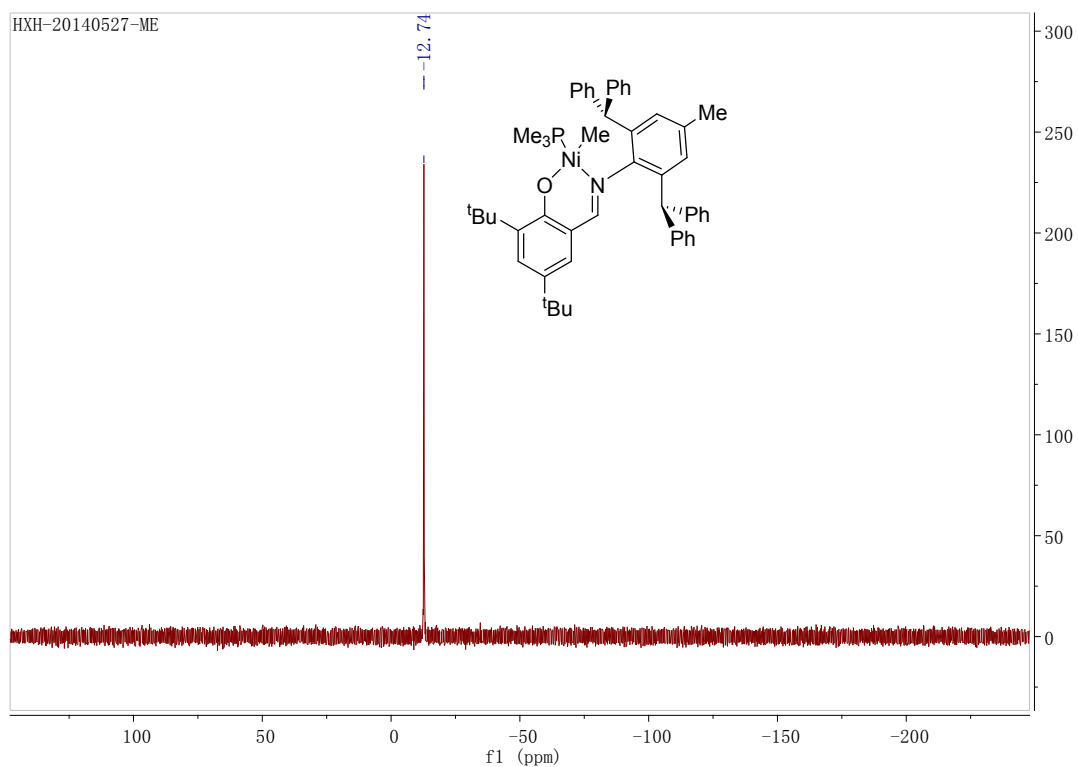

**Figure S12.** <sup>31</sup>P NMR spectrum (162 MHz, C<sub>6</sub>D<sub>6</sub>, ppm) of 2.

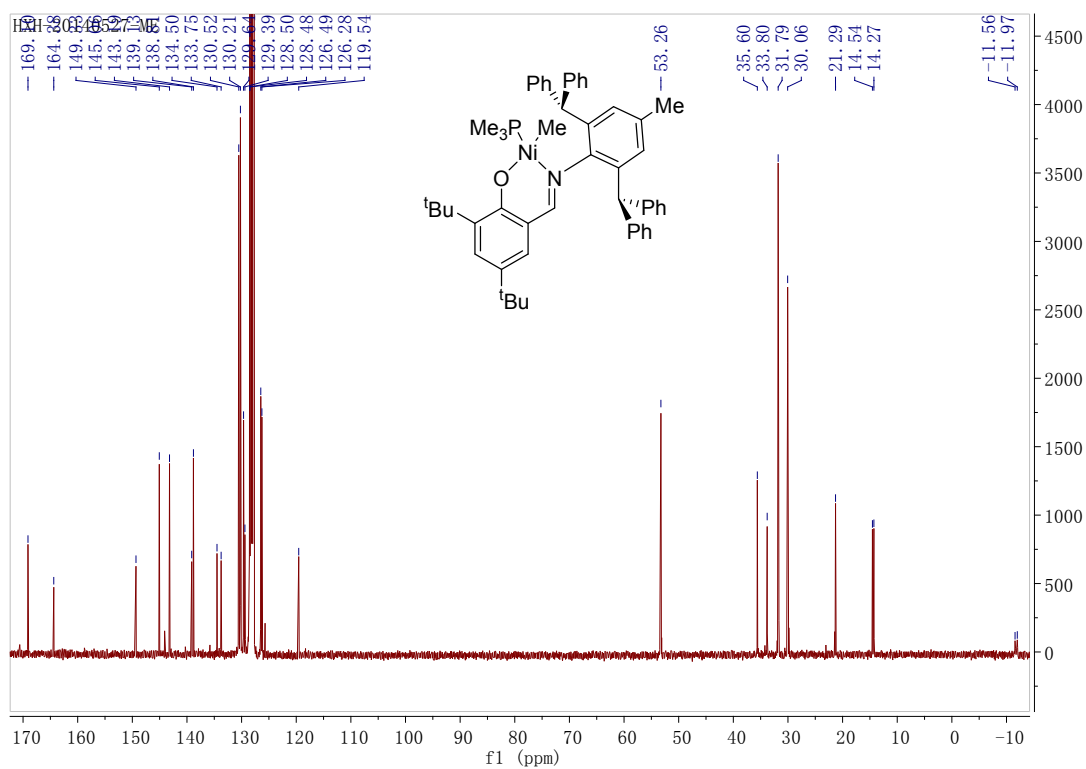

Figure S13.  $^{13}\text{C}$  NMR spectrum (100 MHz,  $\text{C}_6\text{D}_6$ , ppm) of **2**.

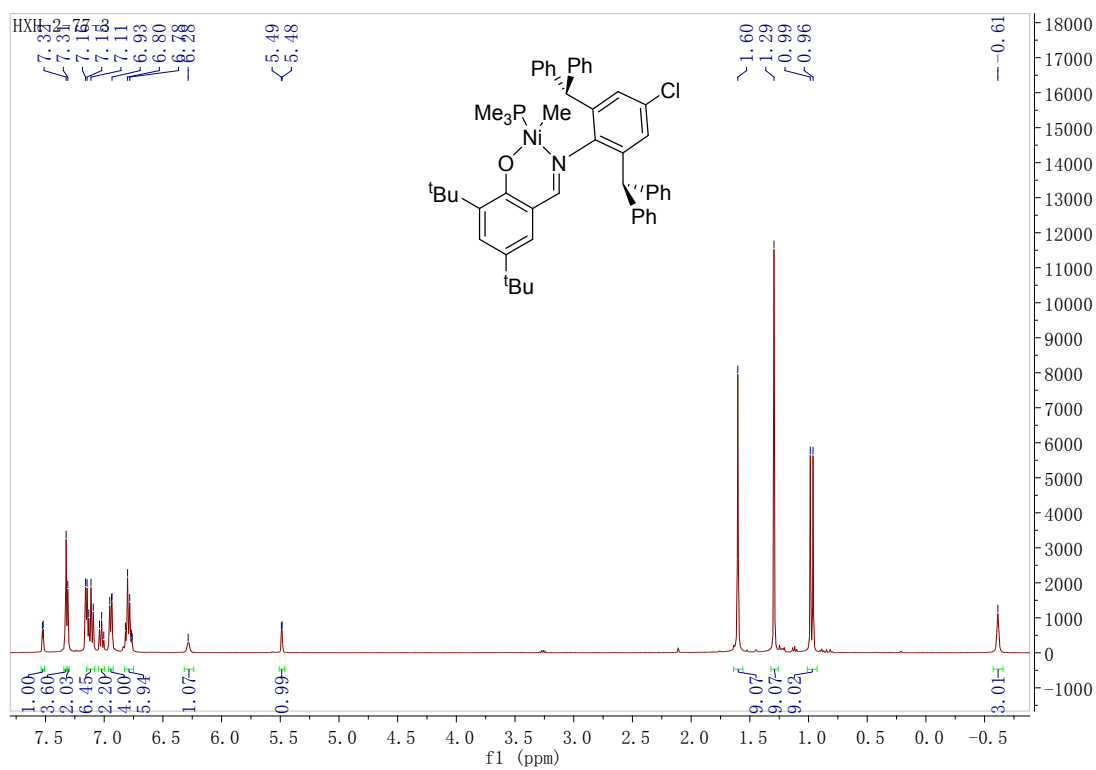

Figure S14.  $^1\text{H}$  NMR spectrum (400 MHz,  $\text{C}_6\text{D}_6$ , ppm) of **3**.



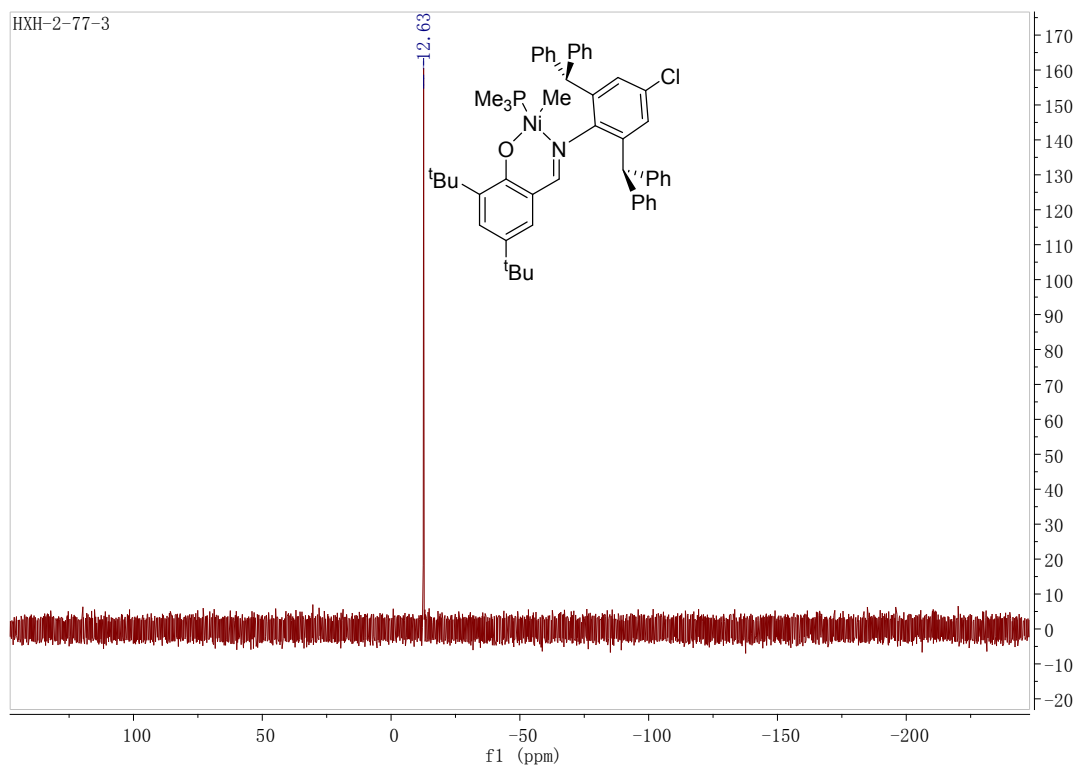

**Figure S15.**  $^{31}\text{P}$  NMR spectrum (162 MHz,  $\text{C}_6\text{D}_6$ , ppm) of **3**.

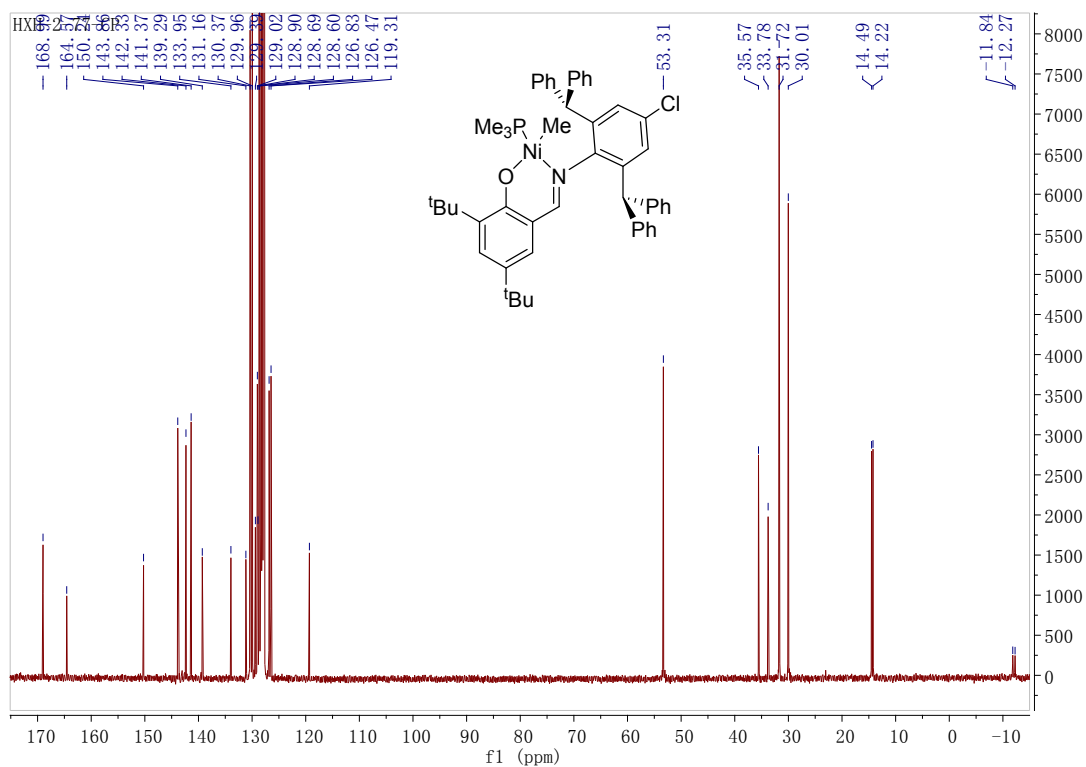

**Figure S16.**  $^{13}\text{C}$  NMR spectrum (100 MHz,  $\text{C}_6\text{D}_6$ , ppm) of **3**.

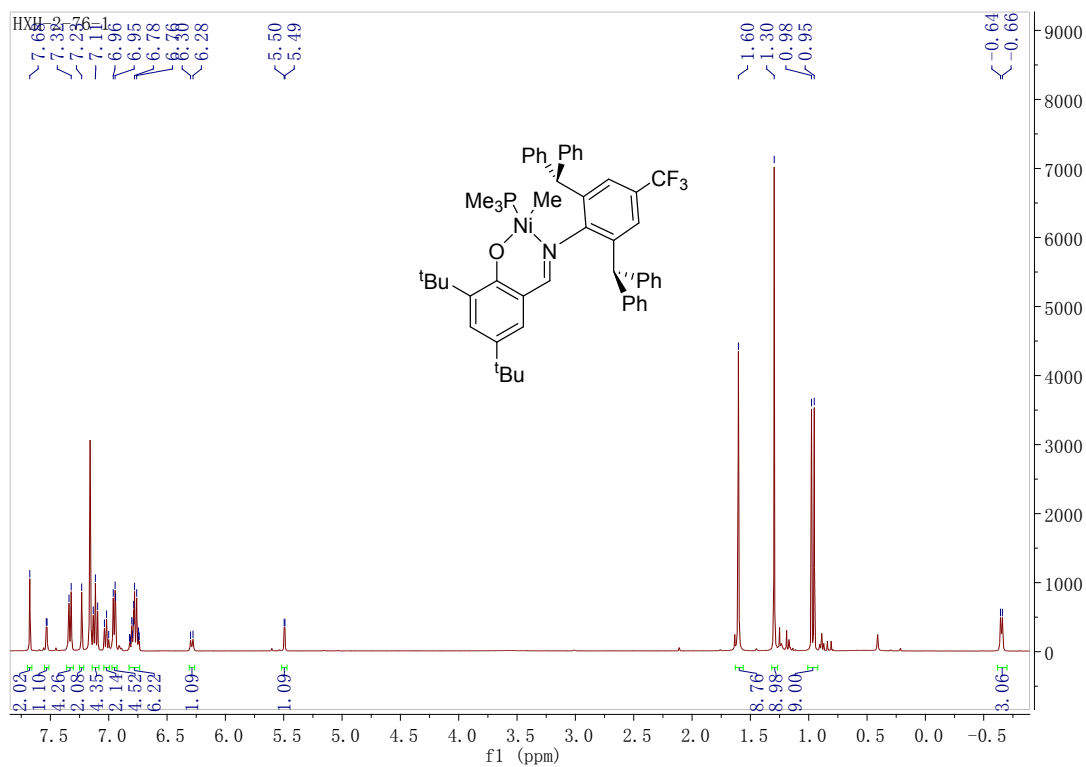

**Figure S17.** <sup>1</sup>H NMR spectrum (400 MHz, C<sub>6</sub>D<sub>6</sub>, ppm) of **4**.

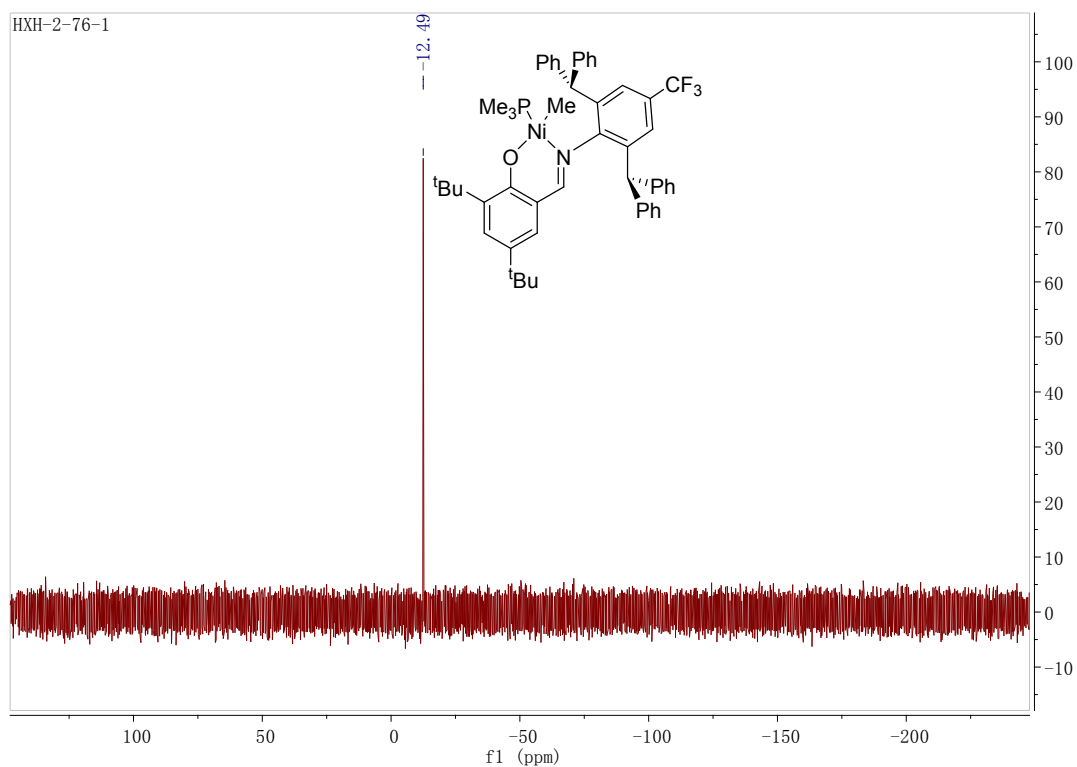

**Figure S18.** <sup>31</sup>P NMR spectrum (162 MHz, C<sub>6</sub>D<sub>6</sub>, ppm) of **4**.

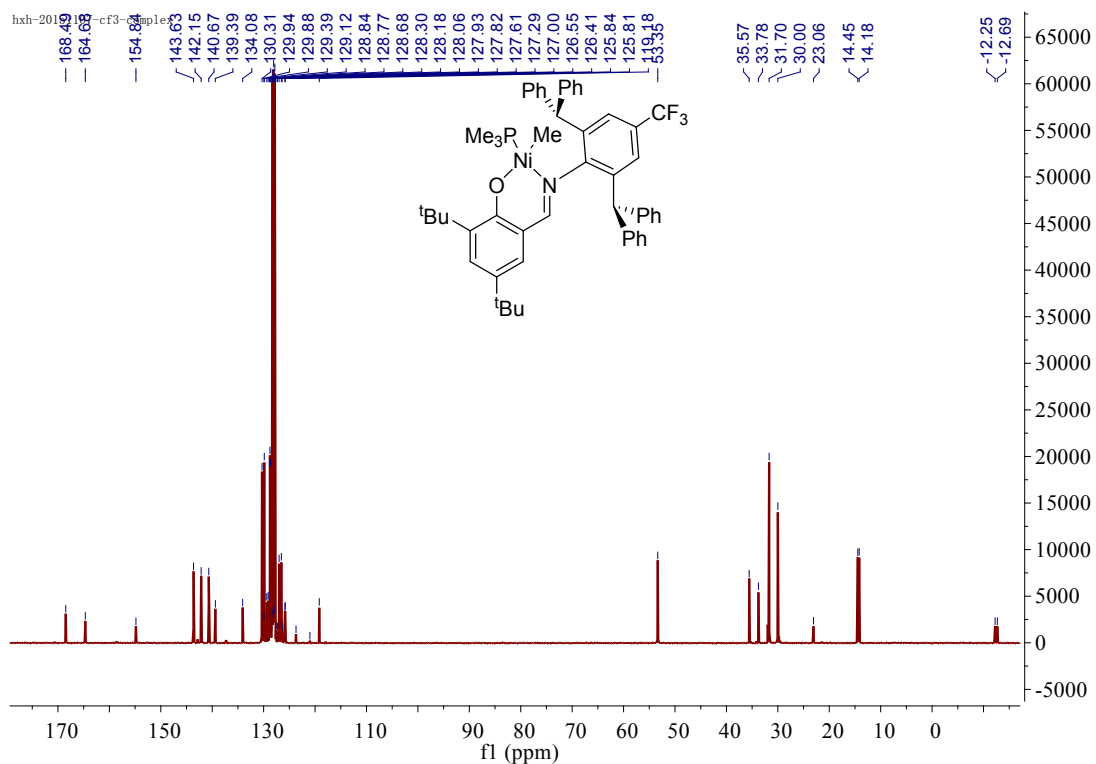

**Figure S19.** <sup>13</sup>C NMR spectrum (100 MHz, C<sub>6</sub>D<sub>6</sub>, ppm) of **4**.

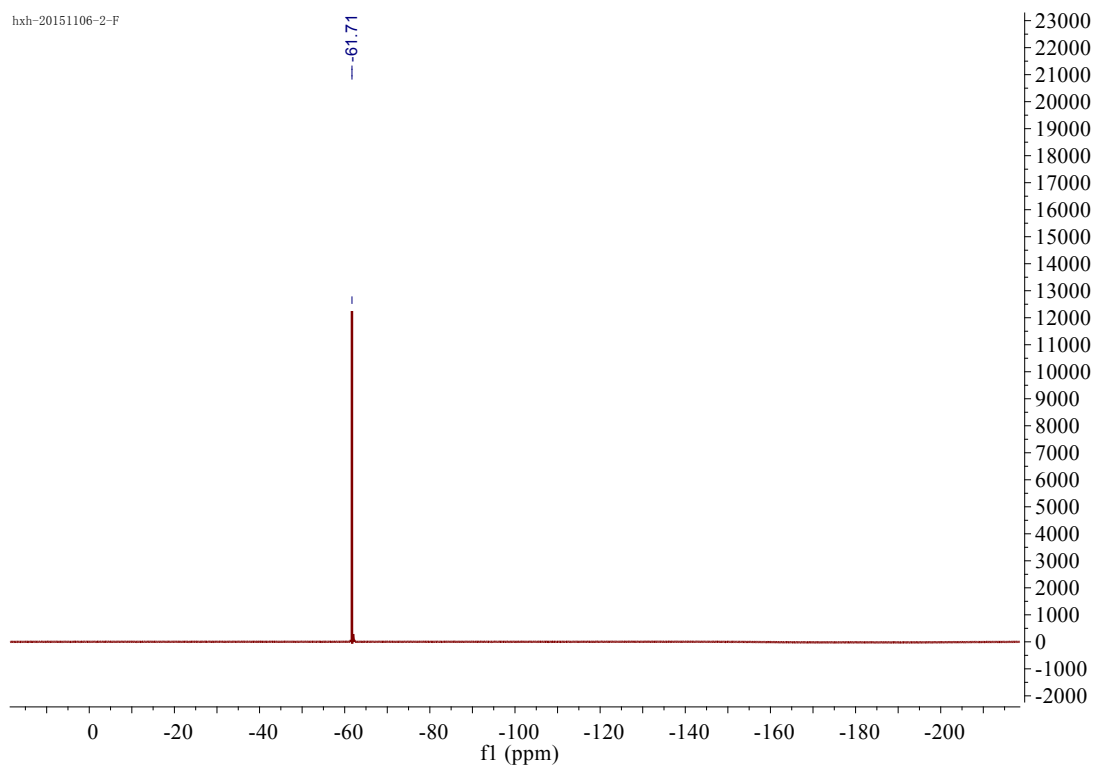

**Figure S20.** <sup>19</sup>F NMR spectrum (282 MHz, C<sub>6</sub>D<sub>6</sub>, ppm) of **4**.

## $^1\text{H}$ NMR, $^{13}\text{C}$ NMR of the Polyethylene.

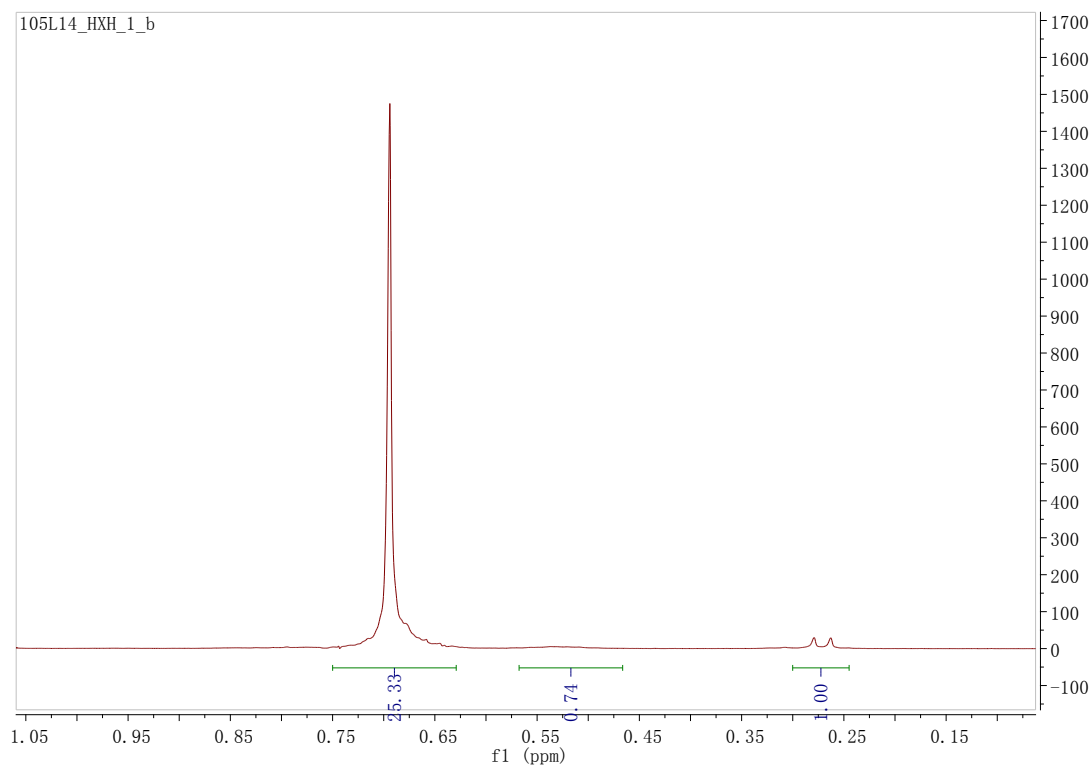

**Figure S21.**  $^1\text{H}$  NMR spectrum (400 MHz,  $d^2$ -1,1,2,2-Tetrachloroethane,  $100^\circ\text{C}$ , ppm) of polyethylene generated by complex **1** at  $25^\circ\text{C}$ .

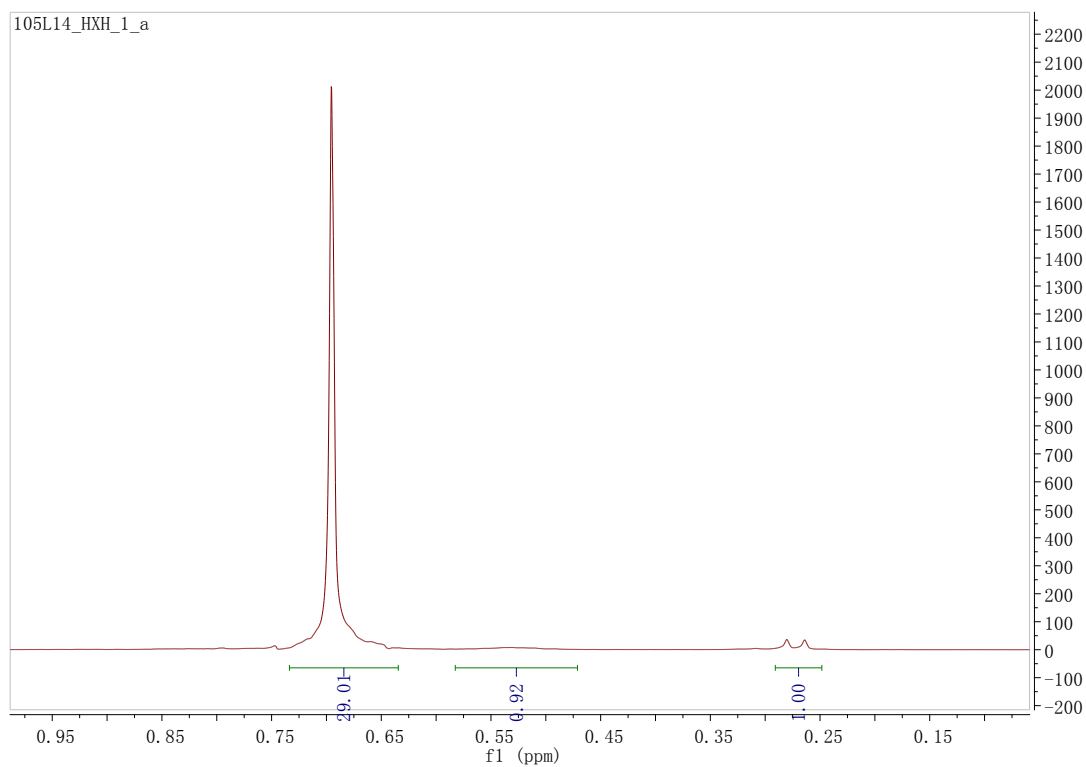

**Figure S22.**  $^1\text{H}$  NMR spectrum (400 MHz,  $d^2$ -1,1,2,2-Tetrachloroethane,  $100^\circ\text{C}$ , ppm) of polyethylene generated by complex **2** at  $25^\circ\text{C}$ .

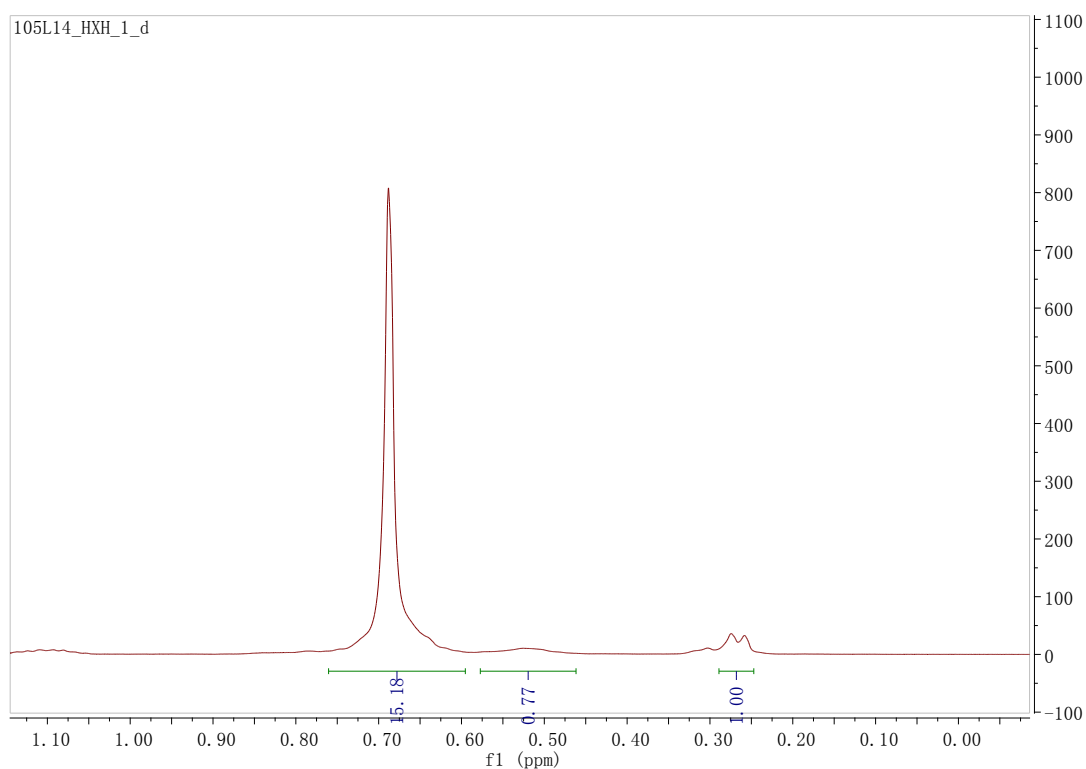

**Figure S23.**  $^1\text{H}$  NMR spectrum (400 MHz,  $d^2$ -1,1,2,2-Tetrachloroethane, 100 °C, ppm) of polyethylene generated by complex **3** at 25 °C.

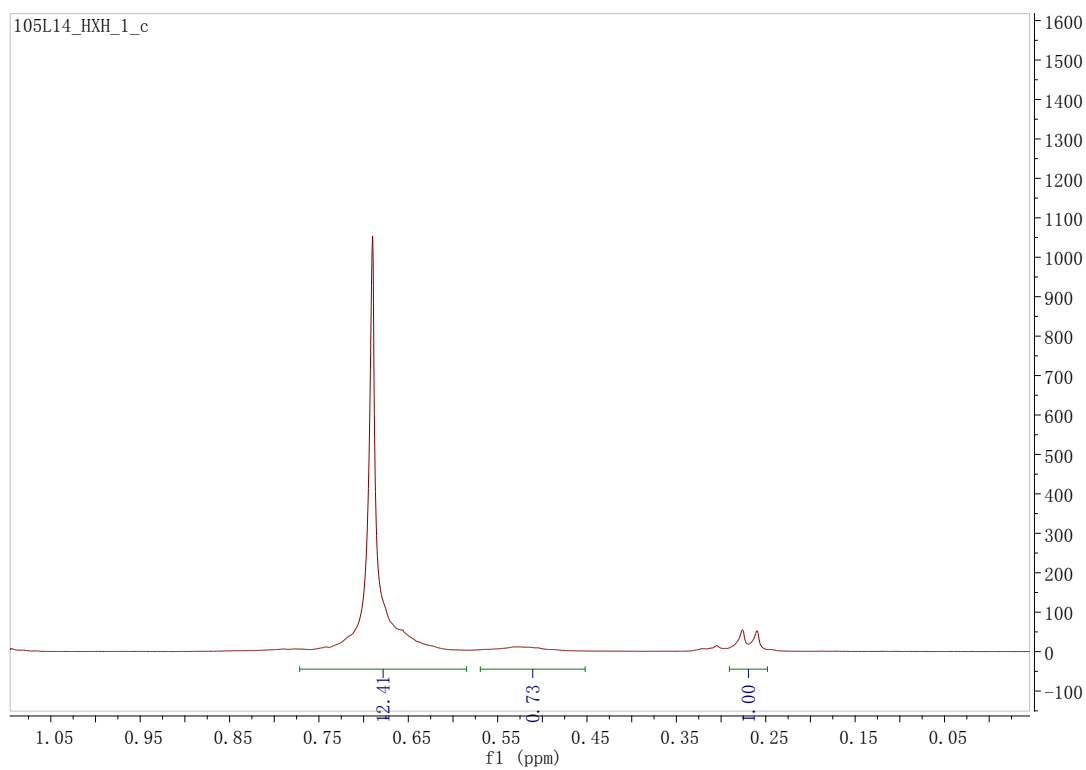

**Figure S24.**  $^1\text{H}$  NMR spectrum (400 MHz,  $d^2$ -1,1,2,2-Tetrachloroethane, 100 °C, ppm) of polyethylene generated by complex **4** at 25 °C.

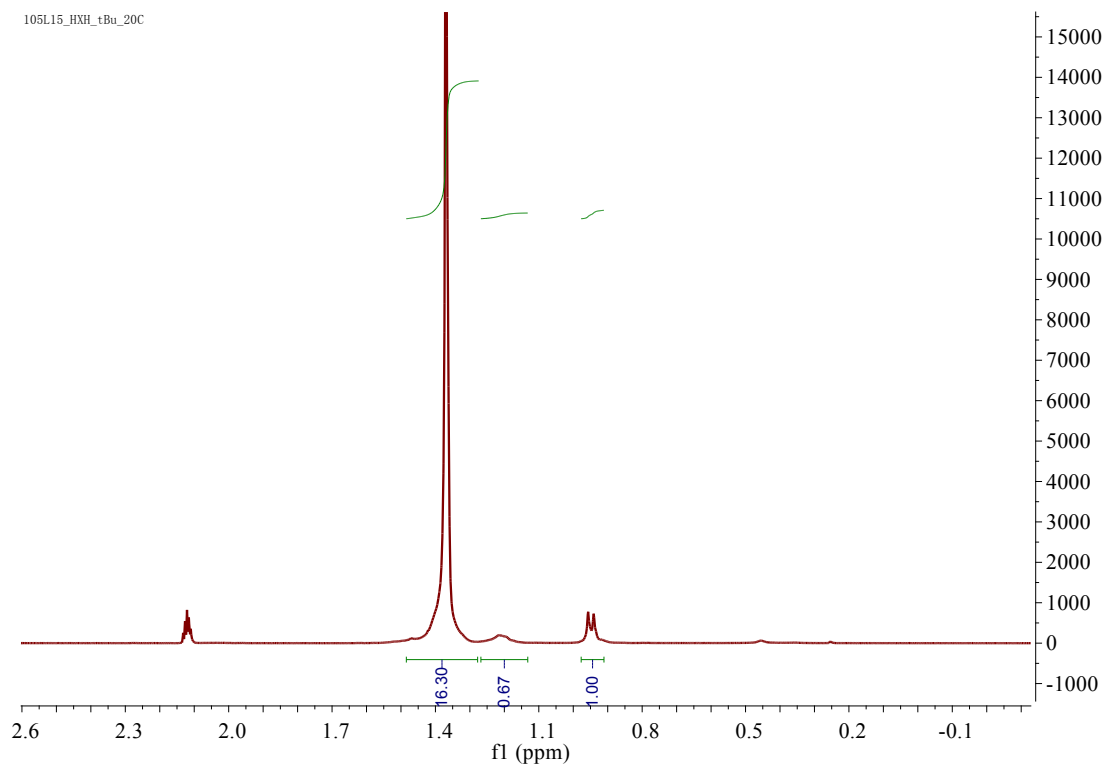

**Figure S25.**  $^1\text{H}$  NMR spectrum (400 MHz,  $d^6$ -toluene, 80 °C, ppm) of polyethylene generated by complex **5** at 25 °C.

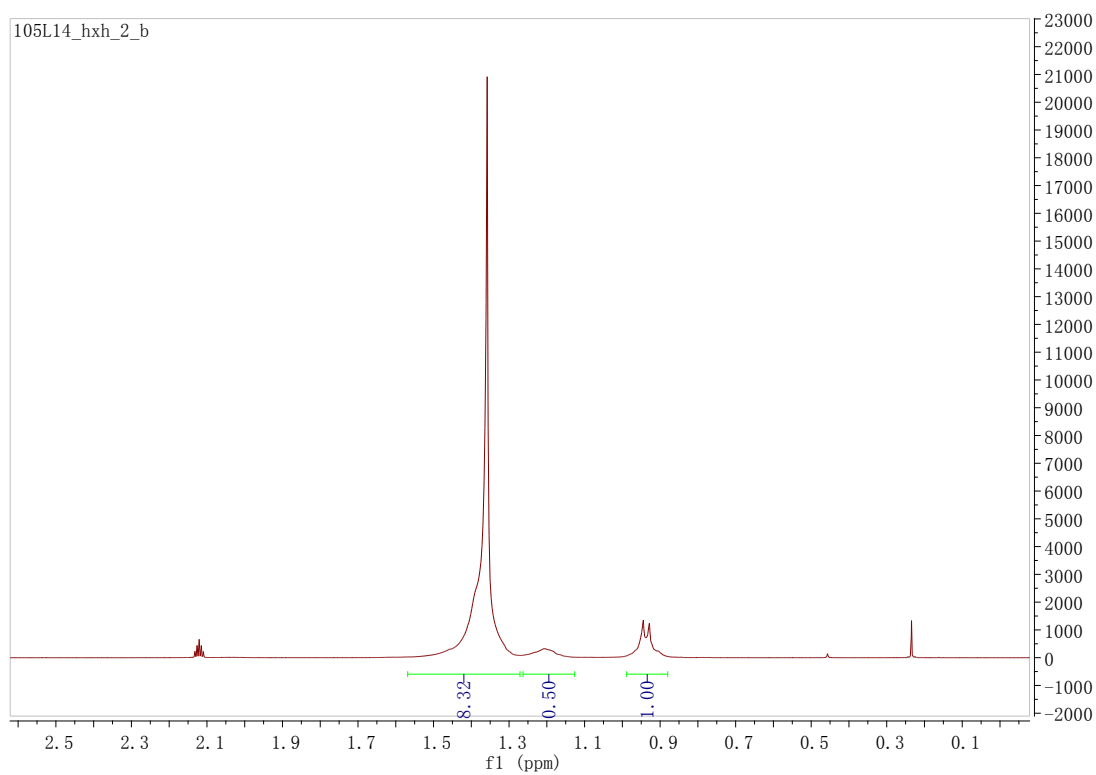

**Figure S26.**  $^1\text{H}$  NMR spectrum (400 MHz,  $d^6$ -toluene, 80 °C, ppm) of polyethylene generated by complex **1** at 50 °C.

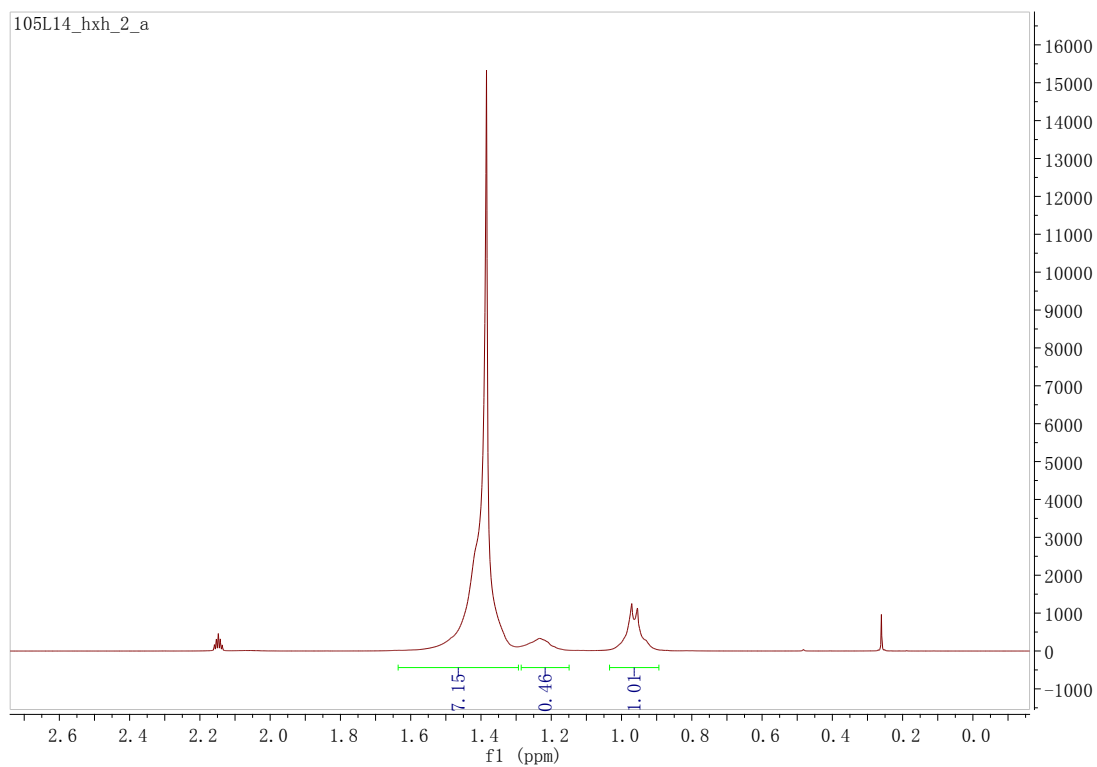

**Figure S27.**  $^1\text{H}$  NMR spectrum (400 MHz,  $d^6$ -toluene, 80 °C, ppm) of polyethylene generated by complex **2** at 50 °C.

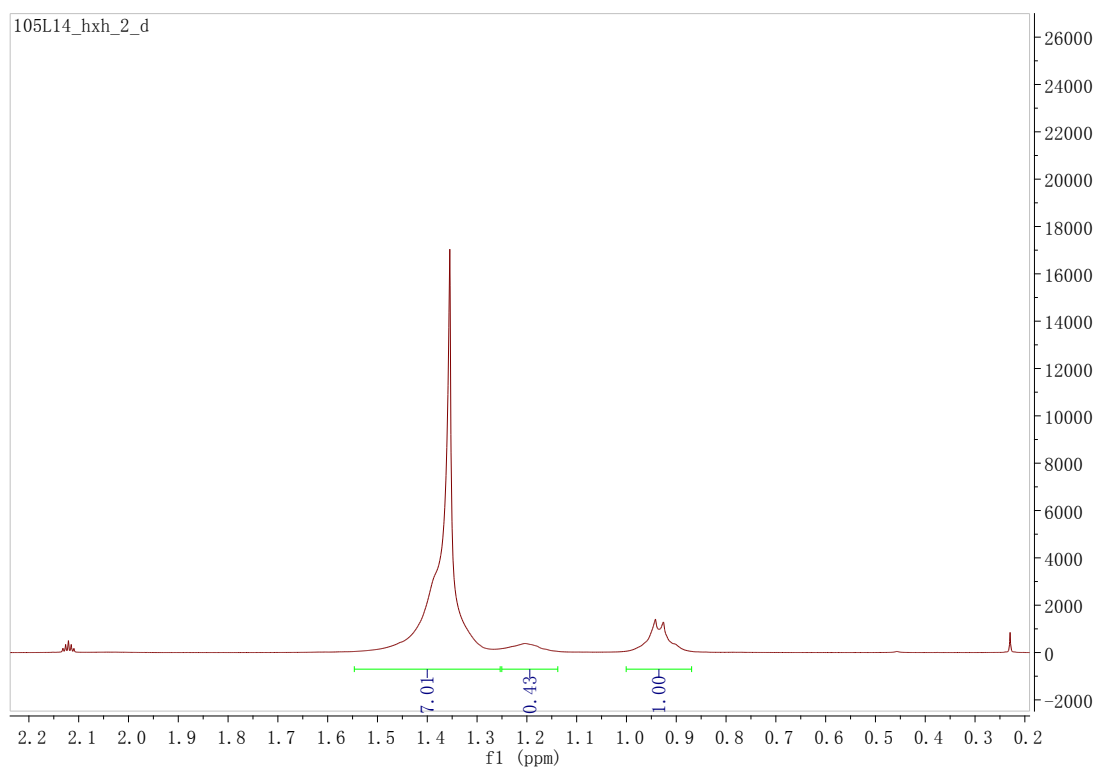

**Figure S28.**  $^1\text{H}$  NMR spectrum (400 MHz,  $d^6$ -toluene, 80 °C, ppm) of polyethylene generated by complex **3** at 50 °C.

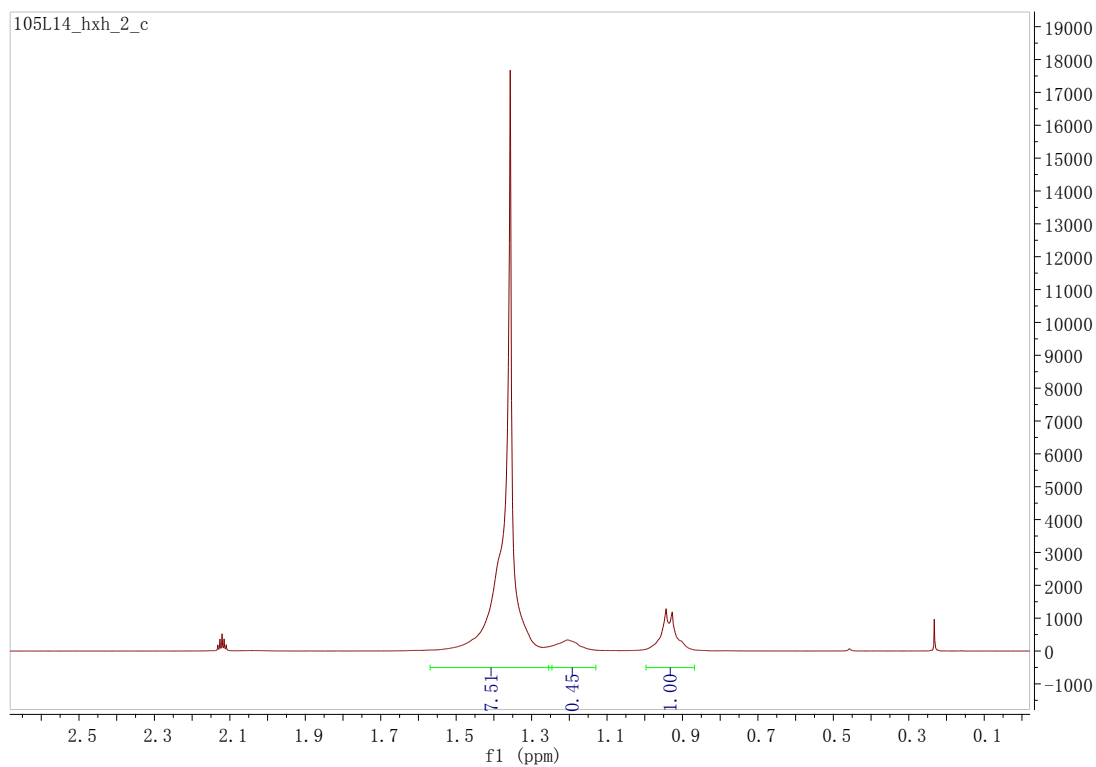

**Figure S29.**  $^1\text{H}$  NMR spectrum (400 MHz,  $d^6$ -toluene, 80 °C, ppm) of polyethylene generated by complex **4** at 50 °C.

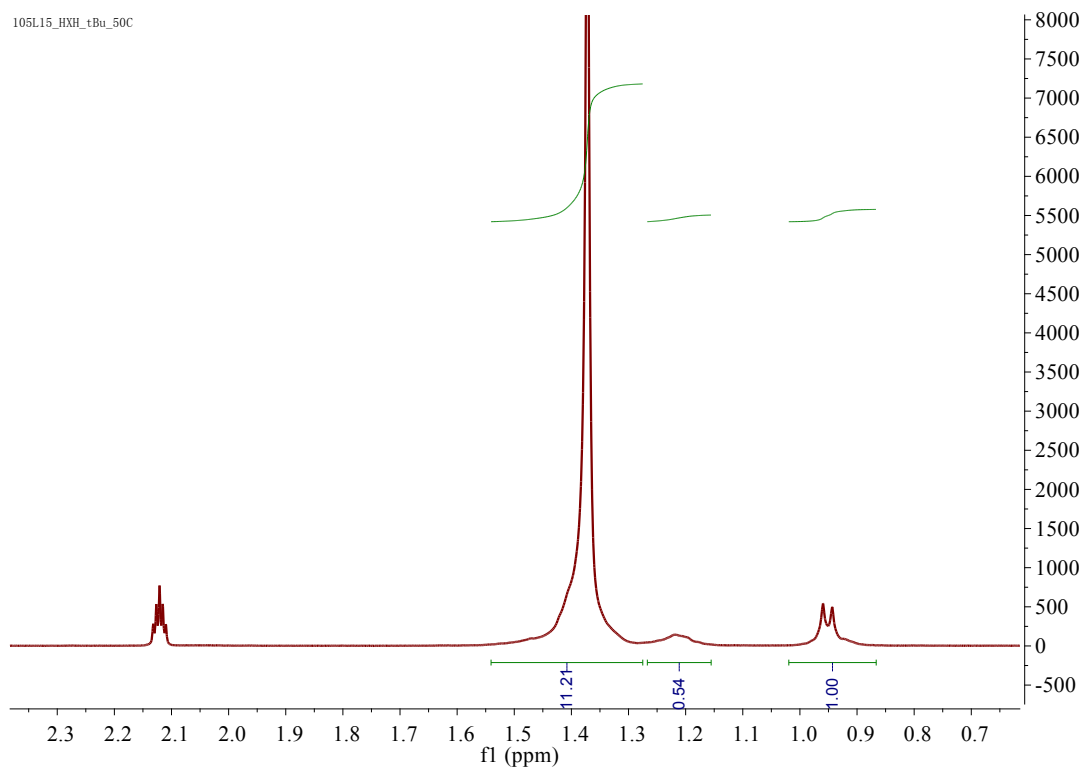

**Figure S30.**  $^1\text{H}$  NMR spectrum (400 MHz,  $d^6$ -toluene, 80 °C, ppm) of polyethylene generated by complex **5** at 50 °C.



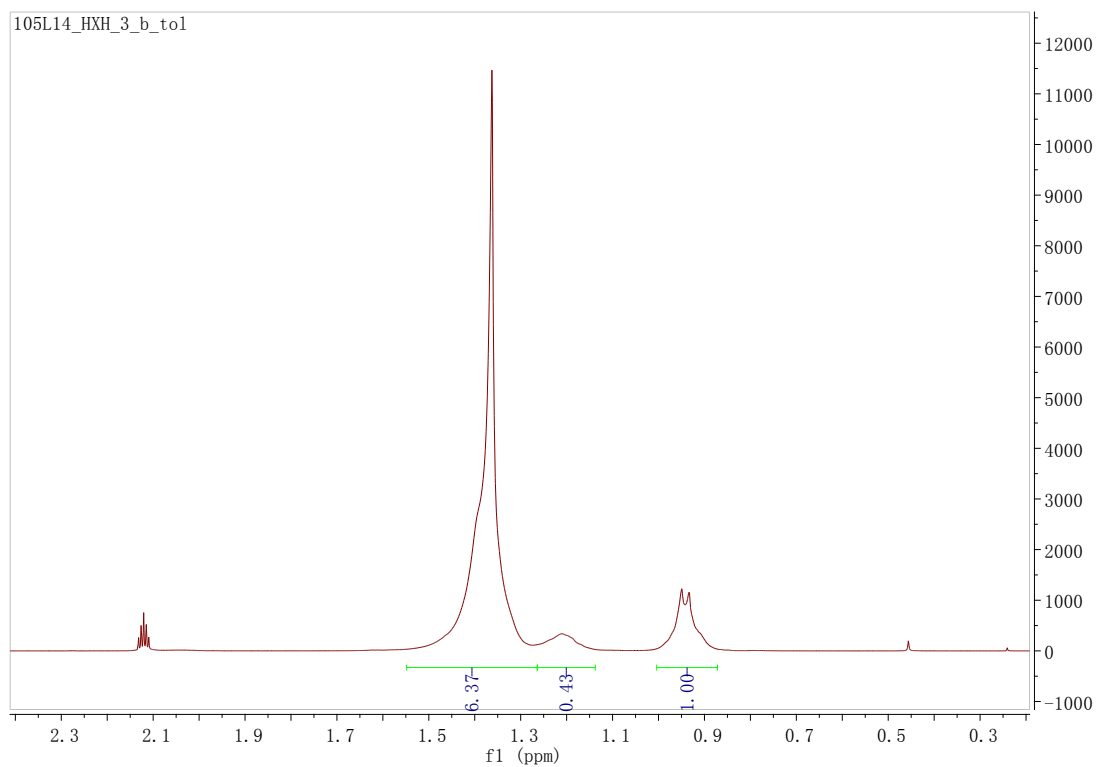

**Figure S31.**  $^1\text{H}$  NMR spectrum (400 MHz,  $d^6$ -toluene, 80 °C, ppm) of polyethylene generated by complex **1** at 80 °C.

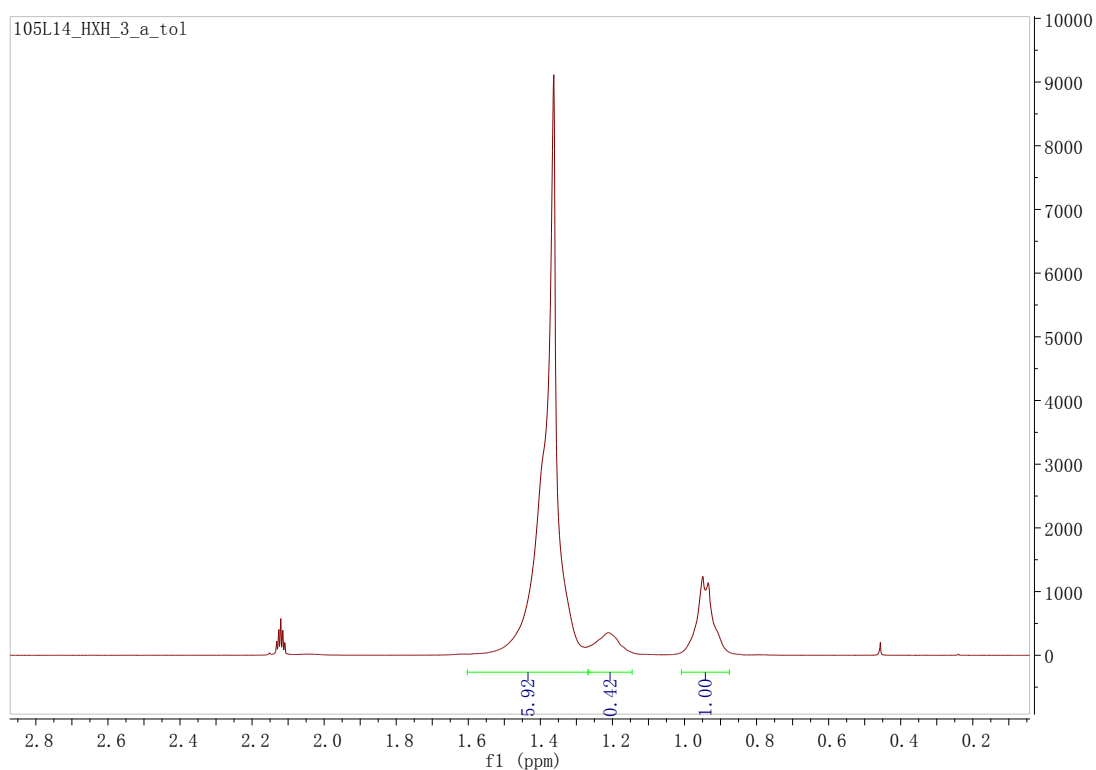

**Figure S32.**  $^1\text{H}$  NMR spectrum (400 MHz,  $d^6$ -toluene, 80 °C, ppm) of polyethylene generated by complex **2** at 80 °C.

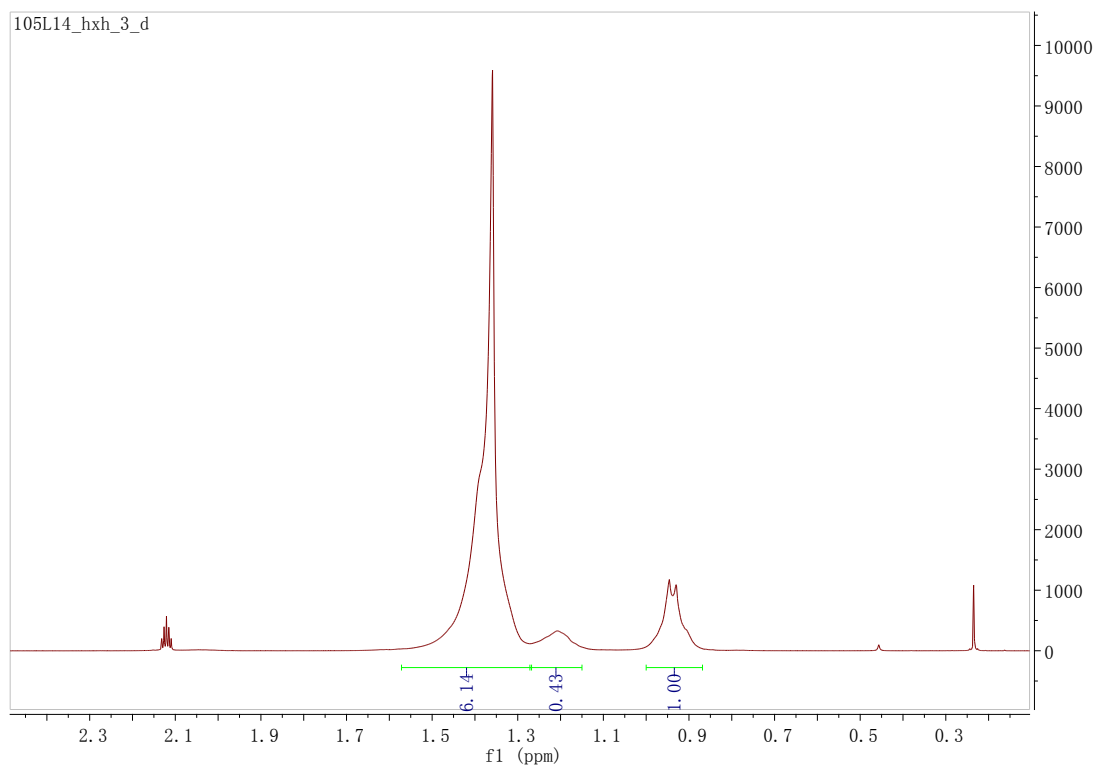

**Figure S33.** <sup>1</sup>H NMR spectrum (400 MHz, d<sup>6</sup>-toluene, 80 °C, ppm) of polyethylene generated by complex **3** at 80 °C.

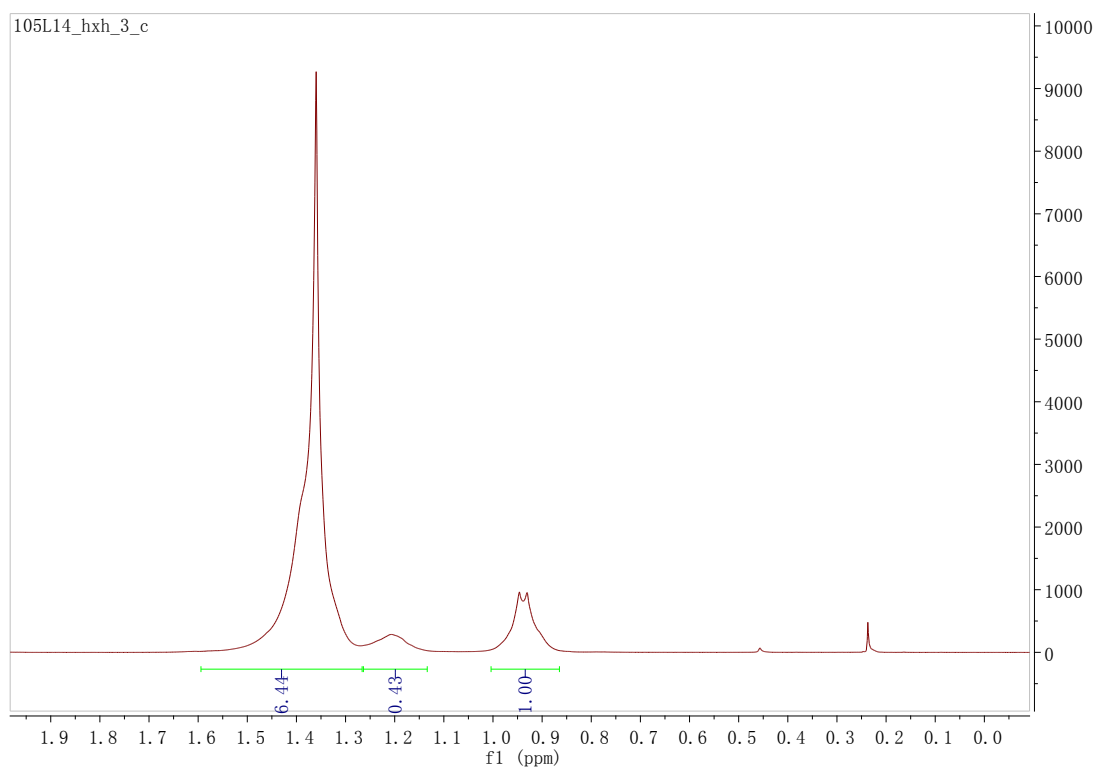

**Figure S34.** <sup>1</sup>H NMR spectrum (400 MHz, d<sup>6</sup>-toluene, 80 °C, ppm) of polyethylene generated by complex **4** at 80 °C.

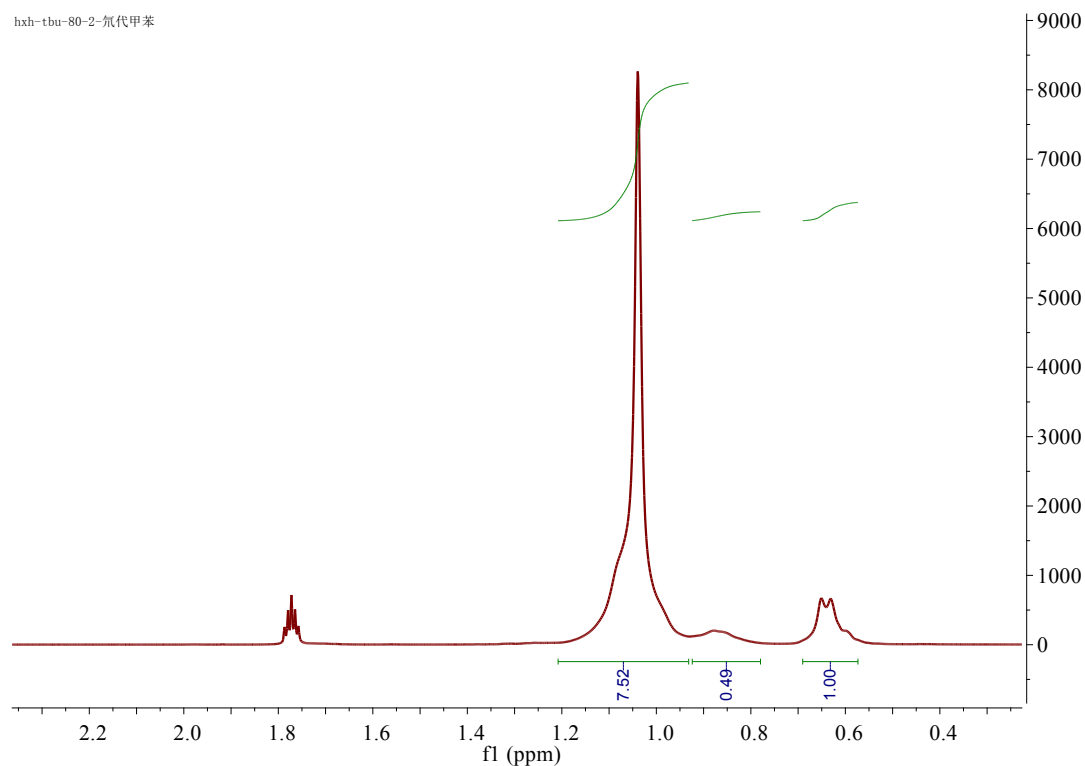

**Figure S35.**  $^1\text{H}$  NMR spectrum (400 MHz,  $d^6$ -toluene, 25 °C, ppm) of polyethylene generated by complex **5** at 80 °C.

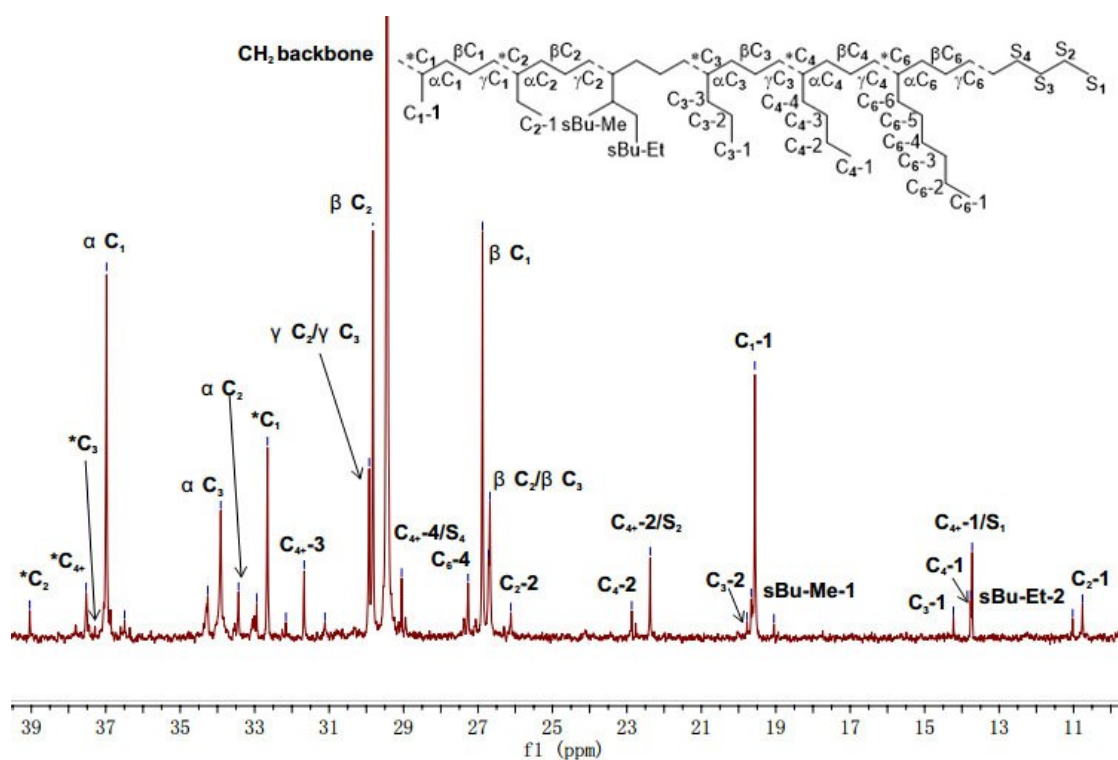

**Figure S36.**  $^{13}\text{C}$  NMR spectrum (400 MHz,  $d^2$ -1,1,2,2-Tetrachloroethane, 80 °C, ppm) of polyethylene generated by complex **1** at 50 °C.

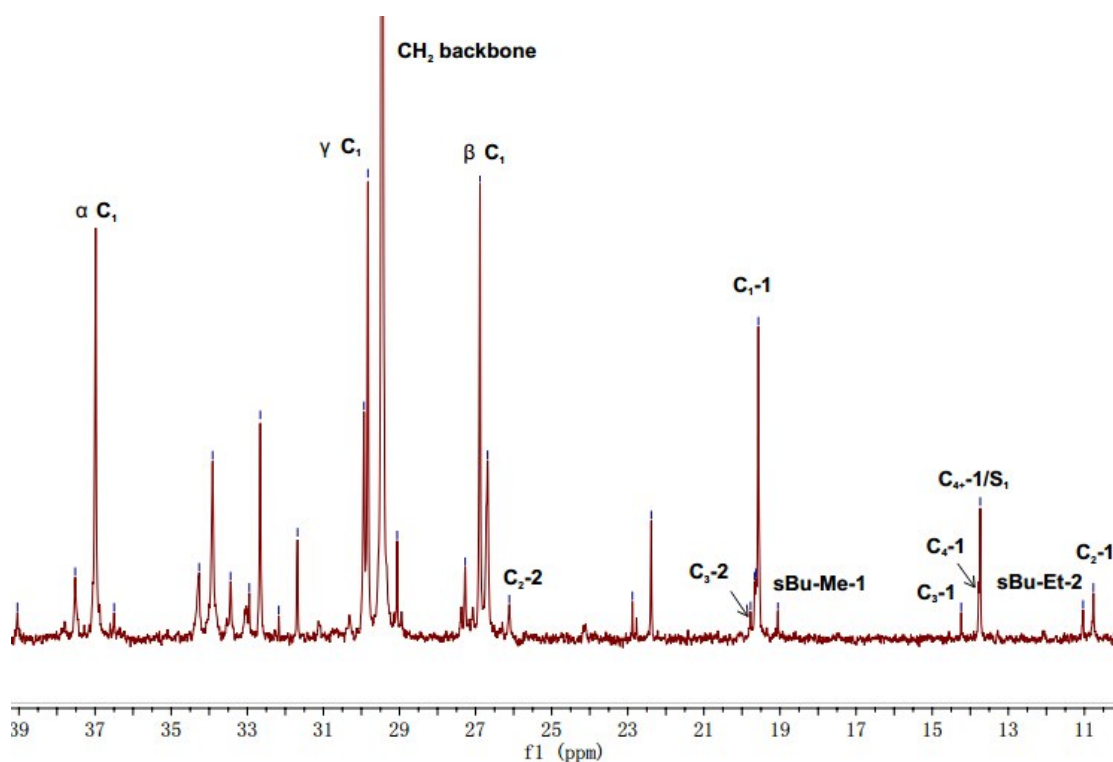

**Figure S37.**  $^{13}\text{C}$  NMR spectrum (400 MHz,  $d^2$ -1,1,2,2-Tetrachloroethane, 80 °C, p pm) of polyethylene generated by complex **2** at 50 °C.

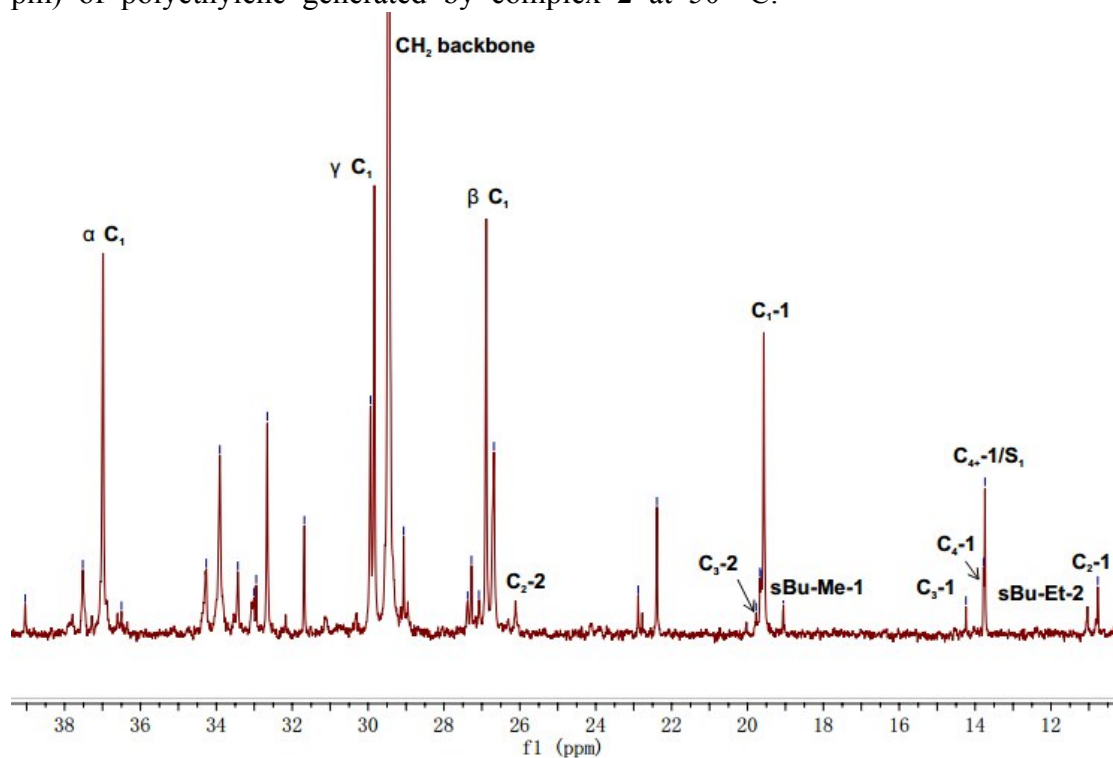

**Figure S38.**  $^{13}\text{C}$  NMR spectrum (400 MHz,  $d^2$ -1,1,2,2-Tetrachloroethane, 80 °C, p pm) of polyethylene generated by complex **3** at 50 °C.



## DSC of Polyethylene generated by precatalyst 4.

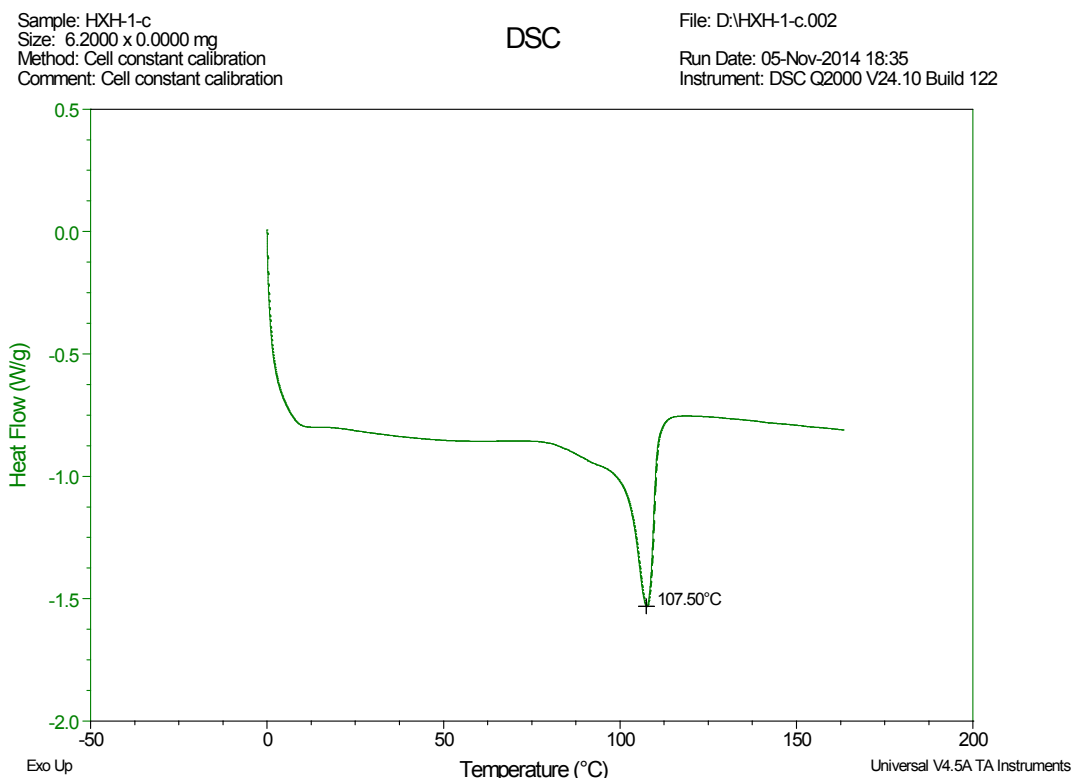

**Figure S40.** DSC of Polyethylene generated by precatalyst **4** (Table 1, entry 4).

## X-Ray Crystallography of complex **1** and **2**.

**Table S1.** Crystal data and structure refinement for [2,4-di-tert-butyl-6-((2,6-di benzhydryl-4-methoxyphenylimino)methyl)-phenolato]-Ni(II)-methyl(trimethyl phosphine)

| data                | <b>1</b>                                            |
|---------------------|-----------------------------------------------------|
| Identification code | HXH-1-163                                           |
| Empirical formula   | C <sub>52</sub> H <sub>60</sub> NNiO <sub>2</sub> P |
| Formula weight      | 820.69                                              |
| Temperature/K       | 290(2)                                              |
| Crystal system      | monoclinic                                          |
| Space group         | P2 <sub>1</sub> /n                                  |
| a/Å                 | 10.8638(3)                                          |
| b/Å                 | 16.9433(4)                                          |
| c/Å                 | 25.4176(5)                                          |
| $\alpha$ /°         | 90                                                  |
| $\beta$ /°          | 98.390(2)                                           |
| $\gamma$ /°         | 90                                                  |

|                                             |                                                               |
|---------------------------------------------|---------------------------------------------------------------|
| Volume/Å <sup>3</sup>                       | 4628.51(19)                                                   |
| Z                                           | 4                                                             |
| ρ <sub>calc</sub> /g/cm <sup>3</sup>        | 1.178                                                         |
| μ/mm <sup>-1</sup>                          | 1.222                                                         |
| F(000)                                      | 1752.0                                                        |
| Crystal size/mm <sup>3</sup>                | 0.350 × 0.320 × 0.220                                         |
| Radiation                                   | CuKα (λ = 1.54184)                                            |
| 2θ range for data collection/°              | 6.29 to 139.848                                               |
| Index ranges                                | -12 ≤ h ≤ 13, -11 ≤ k ≤ 20, -30 ≤ l ≤ 29                      |
| Reflections collected                       | 18287                                                         |
| Independent reflections                     | 8386 [R <sub>int</sub> = 0.0277, R <sub>sigma</sub> = 0.0354] |
| Data/restraints/parameters                  | 8386/47/551                                                   |
| Goodness-of-fit on F <sup>2</sup>           | 1.040                                                         |
| Final R indexes [I ≥ 2σ (I)]                | R <sub>1</sub> = 0.0554, wR <sub>2</sub> = 0.1495             |
| Final R indexes [all data]                  | R <sub>1</sub> = 0.0757, wR <sub>2</sub> = 0.1665             |
| Largest diff. peak/hole / e Å <sup>-3</sup> | 0.43/-0.39                                                    |

**Table S2. Fractional Atomic Coordinates (×10<sup>4</sup>) and Equivalent Isotropic Displacement Parameters (Å<sup>2</sup>×10<sup>3</sup>) for 1. U<sub>eq</sub> is defined as 1/3 of the trace of the orthogonalised U<sub>ij</sub> tensor.**

| Atom | x          | y          | z          | U(eq)     |
|------|------------|------------|------------|-----------|
| Ni1  | 1654.4(4)  | 1571.5(3)  | 5618.9(2)  | 53.97(16) |
| P1   | 2771.4(12) | 541.5(7)   | 5763.3(5)  | 99.8(4)   |
| O1   | 1489.0(18) | 1371.6(12) | 4869.1(7)  | 60.8(5)   |
| O2   | 356(2)     | 4736.2(13) | 7109.3(9)  | 74.7(6)   |
| N1   | 595(2)     | 2486.9(13) | 5522.1(8)  | 49.3(5)   |
| C21  | -473(3)    | 3014.7(16) | 6235.4(10) | 52.3(6)   |
| C36  | 2525(2)    | 3635.2(17) | 5719.6(11) | 53.8(6)   |
| C17  | 1423(2)    | 3644.5(16) | 6037.1(10) | 50.1(6)   |
| C37  | 3661(3)    | 4069.4(19) | 6005.5(12) | 61.5(7)   |
| C6   | -164(2)    | 2259.6(16) | 4576.7(10) | 48.8(6)   |
| C43  | 2156(2)    | 3883.1(17) | 5144.2(11) | 54.0(6)   |
| C20  | -541(3)    | 3578.5(16) | 6631.4(11) | 56.5(7)   |
| C19  | 354(3)     | 4158.9(16) | 6726.7(11) | 56.1(7)   |
| C22  | -1435(3)   | 2356.7(16) | 6131.3(11) | 57.2(7)   |
| C5   | -1061(2)   | 2544.2(17) | 4165.0(11) | 55.6(6)   |
| C7   | -108(2)    | 2648.1(16) | 5076.6(10) | 49.4(6)   |
| C16  | 498(2)     | 3061.5(15) | 5934.7(10) | 48.7(6)   |
| C18  | 1332(3)    | 4192.2(17) | 6433.2(11) | 55.2(6)   |

|      |           |            |            |           |
|------|-----------|------------|------------|-----------|
| C1   | 706(2)    | 1670.0(16) | 4482.8(10) | 52.4(6)   |
| C48  | 2429(3)   | 3398.8(18) | 4737.2(12) | 60.5(7)   |
| C29  | -1956(3)  | 2114.5(18) | 6640.0(12) | 68.6(8)   |
| C4   | -1129(3)  | 2280.7(19) | 3653.2(11) | 61.1(7)   |
| C23  | -2458(3)  | 2546.8(18) | 5673.2(11) | 58.0(7)   |
| C2   | 712(3)    | 1440.9(18) | 3938.9(11) | 62.0(7)   |
| C8   | 1720(4)   | 883(2)     | 3784.0(14) | 85.4(11)  |
| C12  | -2104(3)  | 2583(2)    | 3204.9(13) | 78.3(9)   |
| C46  | 1201(3)   | 4789(2)    | 4476.1(14) | 76.9(9)   |
| C44  | 1529(3)   | 4583(2)    | 5006.0(12) | 65.7(8)   |
| C35  | -555(3)   | 4683(2)    | 7450.5(14) | 85.6(11)  |
| C3   | -203(3)   | 1742(2)    | 3558.2(11) | 66.4(8)   |
| C28  | -2971(3)  | 3291(2)    | 5598.4(14) | 72.4(9)   |
| C47  | 2086(3)   | 3604(2)    | 4211.2(13) | 76.4(9)   |
| C42  | 4322(3)   | 3738(3)    | 6450.1(13) | 79.9(10)  |
| C45  | 1462(3)   | 4299(2)    | 4080.0(14) | 80.4(10)  |
| C25  | -3822(4)  | 2114(3)    | 4893.2(17) | 95.0(12)  |
| C41  | 5370(4)   | 4101(3)    | 6720.9(17) | 100.9(14) |
| C52  | 1947(4)   | 1698(2)    | 6382.4(13) | 96.6(13)  |
| C38  | 4077(3)   | 4775(2)    | 5835.7(19) | 94.5(12)  |
| C27  | -3900(3)  | 3438(3)    | 5171.1(17) | 87.9(11)  |
| C24  | -2897(3)  | 1961(2)    | 5316.3(14) | 76.1(9)   |
| C26  | -4314(3)  | 2851(3)    | 4819.0(17) | 91.4(12)  |
| C30  | -3191(4)  | 2170(3)    | 6687.2(18) | 104.0(14) |
| C34  | -1162(5)  | 1821(3)    | 7064.9(17) | 112.0(16) |
| C11  | 3012(4)   | 1246(3)    | 3958(2)    | 118.9(17) |
| C40  | 5762(4)   | 4802(3)    | 6548(2)    | 112.1(17) |
| C33  | -1601(6)  | 1608(3)    | 7535.3(19) | 135(2)    |
| C10  | 1589(5)   | 74(3)      | 4034.7(18) | 117.5(17) |
| C9   | 1587(5)   | 751(3)     | 3180.6(16) | 131(2)    |
| C39  | 5131(4)   | 5140(3)    | 6107(2)    | 126.2(19) |
| C32  | -2820(7)  | 1673(3)    | 7574(2)    | 134(2)    |
| C31  | -3616(6)  | 1951(4)    | 7158(2)    | 139(2)    |
| C13  | -3385(7)  | 2481(7)    | 3370(3)    | 122(2)    |
| C15  | -2141(10) | 2085(7)    | 2686(4)    | 123(3)    |
| C14  | -1834(11) | 3408(6)    | 3066(5)    | 133(3)    |
| C13' | -2947(10) | 3270(9)    | 3396(5)    | 122(2)    |
| C15' | -2828(13) | 1934(9)    | 2916(5)    | 123(3)    |
| C14' | -1380(14) | 3024(9)    | 2801(6)    | 133(3)    |
| C50  | 3537(11)  | 212(7)     | 6370(3)    | 188(4)    |



|      |          |          |         |        |
|------|----------|----------|---------|--------|
| C49  | 3937(5)  | 424(4)   | 5303(3) | 114(2) |
| C51  | 1788(7)  | -349(3)  | 5544(3) | 122(2) |
| C51' | 2500(18) | -89(8)   | 6346(6) | 122(2) |
| C49' | 4400(11) | 859(9)   | 6093(7) | 114(2) |
| C50' | 3217(19) | -194(10) | 5349(5) | 188(4) |

**Table S3. Anisotropic Displacement Parameters ( $\text{\AA}^2 \times 10^3$ ) for 1. The Anisotropic displacement factor exponent takes the form:  $-2\pi^2[h^2a^{*2}U_{11}+2hka^*b^*U_{12}+\dots]$ .**

| Atom | $U_{11}$ | $U_{22}$ | $U_{33}$ | $U_{23}$  | $U_{13}$  | $U_{12}$  |
|------|----------|----------|----------|-----------|-----------|-----------|
| Ni1  | 62.7(3)  | 52.6(3)  | 43.4(3)  | -1.9(2)   | -3.0(2)   | 8.9(2)    |
| P1   | 119.4(8) | 90.0(7)  | 83.1(7)  | 0.0(6)    | -8.6(6)   | 53.0(6)   |
| O1   | 66.0(11) | 66.6(12) | 46.3(10) | -9.6(9)   | -3.8(9)   | 18.5(10)  |
| O2   | 92.6(15) | 71.4(13) | 61.7(13) | -23.6(11) | 17.0(11)  | -3.7(12)  |
| N1   | 57.8(12) | 50.7(12) | 38.2(11) | -2.0(9)   | 3.4(9)    | 4.4(10)   |
| C21  | 65.2(16) | 49.1(14) | 42.2(13) | 3.0(11)   | 6.8(12)   | 1.7(12)   |
| C36  | 53.6(14) | 56.9(15) | 49.0(15) | -1.7(12)  | 0.9(12)   | 6.0(12)   |
| C17  | 55.6(14) | 53.2(15) | 39.6(13) | 2.6(11)   | 0.6(11)   | 6.5(12)   |
| C37  | 54.1(15) | 70.9(19) | 58.1(17) | -9.8(15)  | 3.0(13)   | 6.6(14)   |
| C6   | 50.3(13) | 54.8(15) | 40.4(13) | -0.9(11)  | 3.6(11)   | 2.2(11)   |
| C43  | 47.7(14) | 64.7(17) | 49.2(15) | -0.1(13)  | 5.2(11)   | -1.0(12)  |
| C20  | 71.3(17) | 55.9(16) | 44.0(14) | -2.1(12)  | 14.1(13)  | 2.1(14)   |
| C19  | 74.5(18) | 52.0(15) | 41.0(14) | -6.8(12)  | 5.6(13)   | 3.7(13)   |
| C22  | 72.0(17) | 48.5(15) | 51.2(15) | -2.3(12)  | 9.5(13)   | -2.2(13)  |
| C5   | 53.4(14) | 64.7(17) | 47.1(14) | 1.1(13)   | 2.1(11)   | 5.1(13)   |
| C7   | 51.8(13) | 52.3(14) | 43.8(14) | 0.7(12)   | 6.5(11)   | 4.9(12)   |
| C16  | 61.1(15) | 46.4(14) | 37.0(12) | 0.7(11)   | 1.4(11)   | 7.7(12)   |
| C18  | 61.2(16) | 54.3(15) | 48.0(15) | -3.2(12)  | 1.7(12)   | -0.8(13)  |
| C1   | 56.8(15) | 56.9(15) | 42.4(14) | -3.5(12)  | 3.3(12)   | 1.3(12)   |
| C48  | 62.1(16) | 69.2(18) | 51.9(16) | -0.7(14)  | 14.4(13)  | -1.2(14)  |
| C29  | 98(2)    | 56.4(17) | 52.5(17) | 0.6(14)   | 14.5(16)  | -16.1(16) |
| C4   | 62.1(16) | 75.2(19) | 43.5(15) | 5.0(14)   | -0.2(12)  | -1.3(15)  |
| C23  | 59.9(15) | 64.0(17) | 52.6(15) | 1.5(14)   | 16.7(13)  | -2.8(13)  |
| C2   | 70.8(18) | 68.5(18) | 45.9(15) | -6.6(13)  | 5.9(13)   | 8.8(15)   |
| C8   | 108(3)   | 96(3)    | 52.6(18) | -11.7(18) | 12.0(18)  | 36(2)     |
| C12  | 80(2)    | 101(3)   | 47.5(16) | 7.2(17)   | -10.9(15) | 9.8(19)   |
| C46  | 70.8(19) | 92(2)    | 68(2)    | 24.9(19)  | 8.0(16)   | 14.9(18)  |
| C44  | 63.9(17) | 76(2)    | 57.0(17) | 4.6(15)   | 8.8(14)   | 13.0(15)  |
| C35  | 96(2)    | 97(3)    | 66(2)    | -30(2)    | 19.4(19)  | 9(2)      |
| C3   | 83(2)    | 78(2)    | 37.2(14) | -4.6(14)  | 5.0(14)   | 0.3(17)   |

|      |        |        |          |          |           |           |
|------|--------|--------|----------|----------|-----------|-----------|
| C28  | 74(2)  | 73(2)  | 72(2)    | 2.5(17)  | 16.2(17)  | 6.3(16)   |
| C47  | 87(2)  | 95(3)  | 49.1(17) | -2.1(17) | 18.6(16)  | -5(2)     |
| C42  | 73(2)  | 105(3) | 57.1(19) | 0.7(19)  | -6.3(16)  | -1.0(19)  |
| C45  | 80(2)  | 107(3) | 53.3(18) | 15.8(19) | 7.0(16)   | 0(2)      |
| C25  | 83(2)  | 112(3) | 84(3)    | -14(2)   | -6(2)     | -7(2)     |
| C41  | 78(2)  | 142(4) | 73(2)    | -19(3)   | -21.6(19) | 12(3)     |
| C52  | 147(3) | 89(2)  | 48.0(17) | 4.1(17)  | -6(2)     | 52(2)     |
| C38  | 78(2)  | 80(2)  | 115(3)   | 9(2)     | -22(2)    | -10.2(19) |
| C27  | 75(2)  | 98(3)  | 90(3)    | 16(2)    | 13(2)     | 21(2)     |
| C24  | 79(2)  | 76(2)  | 71(2)    | -6.7(18) | 2.7(17)   | -4.6(17)  |
| C26  | 66(2)  | 129(4) | 77(2)    | 10(3)    | 4.7(18)   | 10(2)     |
| C30  | 113(3) | 118(3) | 90(3)    | 31(3)    | 46(3)     | 8(3)      |
| C34  | 119(3) | 137(4) | 74(3)    | 37(3)    | -6(2)     | -43(3)    |
| C11  | 85(3)  | 158(4) | 117(4)   | -21(3)   | 26(3)     | 39(3)     |
| C40  | 74(2)  | 111(4) | 140(4)   | -45(3)   | -22(3)    | -2(2)     |
| C33  | 169(5) | 153(5) | 72(3)    | 42(3)    | -17(3)    | -72(4)    |
| C10  | 176(5) | 91(3)  | 86(3)    | -14(2)   | 20(3)     | 50(3)     |
| C9   | 172(5) | 162(5) | 61(2)    | -19(3)   | 26(3)     | 72(4)     |
| C39  | 93(3)  | 95(3)  | 173(5)   | 3(3)     | -39(3)    | -19(2)    |
| C32  | 198(6) | 136(4) | 73(3)    | 12(3)    | 37(4)     | -70(4)    |
| C31  | 152(5) | 174(5) | 107(4)   | 40(4)    | 69(4)     | 0(4)      |
| C13  | 88(4)  | 182(6) | 86(4)    | 21(5)    | -16(3)    | 40(5)     |
| C15  | 123(6) | 147(6) | 82(5)    | -4(5)    | -40(4)    | 10(5)     |
| C14  | 147(6) | 120(6) | 115(6)   | 43(5)    | -30(5)    | 11(5)     |
| C13' | 88(4)  | 182(6) | 86(4)    | 21(5)    | -16(3)    | 40(5)     |
| C15' | 123(6) | 147(6) | 82(5)    | -4(5)    | -40(4)    | 10(5)     |
| C14' | 147(6) | 120(6) | 115(6)   | 43(5)    | -30(5)    | 11(5)     |
| C50  | 222(6) | 186(6) | 134(4)   | 40(5)    | -45(5)    | 70(5)     |
| C49  | 71(3)  | 113(4) | 161(6)   | 22(4)    | 21(3)     | 32(3)     |
| C51  | 137(5) | 56(3)  | 178(7)   | 16(4)    | 40(5)     | -1(3)     |
| C51' | 137(5) | 56(3)  | 178(7)   | 16(4)    | 40(5)     | -1(3)     |
| C49' | 71(3)  | 113(4) | 161(6)   | 22(4)    | 21(3)     | 32(3)     |
| C50' | 222(6) | 186(6) | 134(4)   | 40(5)    | -45(5)    | 70(5)     |

**Table S4. Bond Lengths for 1.**

| Atom | Atom | Length/Å   | Atom | Atom | Length/Å |
|------|------|------------|------|------|----------|
| Ni1  | O1   | 1.9183(19) | C1   | C2   | 1.437(4) |
| Ni1  | N1   | 1.926(2)   | C48  | C47  | 1.379(4) |
| Ni1  | C52  | 1.932(3)   | C29  | C30  | 1.367(5) |

|     |      |            |     |      |           |
|-----|------|------------|-----|------|-----------|
| Ni1 | P1   | 2.1268(10) | C29 | C34  | 1.373(5)  |
| P1  | C50  | 1.733(6)   | C4  | C3   | 1.405(4)  |
| P1  | C50' | 1.745(9)   | C4  | C12  | 1.526(4)  |
| P1  | C49  | 1.857(6)   | C23 | C28  | 1.380(4)  |
| P1  | C51' | 1.885(14)  | C23 | C24  | 1.381(4)  |
| P1  | C51  | 1.885(7)   | C2  | C3   | 1.380(4)  |
| P1  | C49' | 1.921(13)  | C2  | C8   | 1.541(4)  |
| O1  | C1   | 1.304(3)   | C8  | C10  | 1.528(6)  |
| O2  | C19  | 1.379(3)   | C8  | C9   | 1.536(5)  |
| O2  | C35  | 1.411(4)   | C8  | C11  | 1.536(6)  |
| N1  | C7   | 1.299(3)   | C12 | C15' | 1.481(14) |
| N1  | C16  | 1.446(3)   | C12 | C14  | 1.483(10) |
| C21 | C16  | 1.392(4)   | C12 | C13  | 1.521(9)  |
| C21 | C20  | 1.397(4)   | C12 | C15  | 1.561(10) |
| C21 | C22  | 1.525(4)   | C12 | C14' | 1.571(15) |
| C36 | C43  | 1.518(4)   | C12 | C13' | 1.601(13) |
| C36 | C37  | 1.527(4)   | C46 | C45  | 1.366(5)  |
| C36 | C17  | 1.538(4)   | C46 | C44  | 1.386(4)  |
| C17 | C18  | 1.384(4)   | C28 | C27  | 1.393(5)  |
| C17 | C16  | 1.406(4)   | C47 | C45  | 1.375(5)  |
| C37 | C42  | 1.367(4)   | C42 | C41  | 1.386(5)  |
| C37 | C38  | 1.370(5)   | C25 | C26  | 1.360(6)  |
| C6  | C5   | 1.407(4)   | C25 | C24  | 1.385(5)  |
| C6  | C1   | 1.419(4)   | C41 | C40  | 1.356(7)  |
| C6  | C7   | 1.424(4)   | C38 | C39  | 1.392(5)  |
| C43 | C48  | 1.386(4)   | C27 | C26  | 1.369(6)  |
| C43 | C44  | 1.388(4)   | C30 | C31  | 1.395(6)  |
| C20 | C19  | 1.380(4)   | C34 | C33  | 1.398(6)  |
| C19 | C18  | 1.385(4)   | C40 | C39  | 1.354(7)  |
| C22 | C23  | 1.522(4)   | C33 | C32  | 1.346(8)  |
| C22 | C29  | 1.541(4)   | C32 | C31  | 1.350(8)  |
| C5  | C4   | 1.367(4)   |     |      |           |

**Table S5. Bond Angles for 1.**

| Atom | Atom | Atom | Angle/°    | Atom | Atom | Atom | Angle/°  |
|------|------|------|------------|------|------|------|----------|
| O1   | Ni1  | N1   | 92.73(8)   | O1   | C1   | C6   | 121.6(2) |
| O1   | Ni1  | C52  | 174.50(12) | O1   | C1   | C2   | 121.7(2) |
| N1   | Ni1  | C52  | 92.68(12)  | C6   | C1   | C2   | 116.7(2) |
| O1   | Ni1  | P1   | 89.71(7)   | C47  | C48  | C43  | 121.1(3) |

|      |     |      |            |      |     |      |          |
|------|-----|------|------------|------|-----|------|----------|
| N1   | Ni1 | P1   | 176.70(8)  | C30  | C29 | C34  | 117.9(4) |
| C52  | Ni1 | P1   | 84.93(11)  | C30  | C29 | C22  | 122.7(3) |
| C50  | P1  | C49  | 104.1(5)   | C34  | C29 | C22  | 119.4(3) |
| C50' | P1  | C51' | 99.2(6)    | C5   | C4  | C3   | 115.8(3) |
| C50  | P1  | C51  | 100.5(5)   | C5   | C4  | C12  | 122.5(3) |
| C49  | P1  | C51  | 97.9(3)    | C3   | C4  | C12  | 121.7(3) |
| C50' | P1  | C49' | 98.3(6)    | C28  | C23 | C24  | 118.2(3) |
| C51' | P1  | C49' | 93.1(8)    | C28  | C23 | C22  | 122.2(3) |
| C50  | P1  | Ni1  | 127.3(4)   | C24  | C23 | C22  | 119.6(3) |
| C50' | P1  | Ni1  | 133.1(6)   | C3   | C2  | C1   | 118.1(3) |
| C49  | P1  | Ni1  | 113.8(2)   | C3   | C2  | C8   | 120.9(3) |
| C51' | P1  | Ni1  | 116.8(5)   | C1   | C2  | C8   | 121.0(3) |
| C51  | P1  | Ni1  | 108.7(2)   | C10  | C8  | C9   | 106.5(4) |
| C49' | P1  | Ni1  | 108.1(4)   | C10  | C8  | C11  | 112.1(4) |
| C1   | O1  | Ni1  | 129.48(17) | C9   | C8  | C11  | 107.1(4) |
| C19  | O2  | C35  | 117.4(3)   | C10  | C8  | C2   | 109.3(3) |
| C7   | N1  | C16  | 113.3(2)   | C9   | C8  | C2   | 112.2(3) |
| C7   | N1  | Ni1  | 123.03(18) | C11  | C8  | C2   | 109.6(3) |
| C16  | N1  | Ni1  | 123.70(16) | C14  | C12 | C13  | 113.1(7) |
| C16  | C21 | C20  | 118.7(3)   | C15' | C12 | C4   | 112.4(6) |
| C16  | C21 | C22  | 120.1(2)   | C14  | C12 | C4   | 110.8(5) |
| C20  | C21 | C22  | 121.2(2)   | C13  | C12 | C4   | 108.6(4) |
| C43  | C36 | C37  | 114.0(2)   | C14  | C12 | C15  | 106.8(7) |
| C43  | C36 | C17  | 112.7(2)   | C13  | C12 | C15  | 105.1(6) |
| C37  | C36 | C17  | 112.5(2)   | C4   | C12 | C15  | 112.3(5) |
| C18  | C17 | C16  | 118.7(2)   | C15' | C12 | C14' | 108.1(8) |
| C18  | C17 | C36  | 122.2(2)   | C4   | C12 | C14' | 106.8(5) |
| C16  | C17 | C36  | 119.1(2)   | C15' | C12 | C13' | 113.8(8) |
| C42  | C37 | C38  | 117.4(3)   | C4   | C12 | C13' | 112.5(4) |
| C42  | C37 | C36  | 119.1(3)   | C14' | C12 | C13' | 102.4(8) |
| C38  | C37 | C36  | 123.5(3)   | C45  | C46 | C44  | 120.7(3) |
| C5   | C6  | C1   | 121.5(2)   | C46  | C44 | C43  | 120.5(3) |
| C5   | C6  | C7   | 116.1(2)   | C2   | C3  | C4   | 125.5(3) |
| C1   | C6  | C7   | 122.2(2)   | C23  | C28 | C27  | 120.2(3) |
| C48  | C43 | C44  | 117.9(3)   | C45  | C47 | C48  | 120.3(3) |
| C48  | C43 | C36  | 120.0(3)   | C37  | C42 | C41  | 121.5(4) |
| C44  | C43 | C36  | 122.1(3)   | C46  | C45 | C47  | 119.3(3) |
| C19  | C20 | C21  | 120.2(3)   | C26  | C25 | C24  | 120.4(4) |
| O2   | C19 | C20  | 123.9(3)   | C40  | C41 | C42  | 120.1(4) |
| O2   | C19 | C18  | 115.4(3)   | C37  | C38 | C39  | 121.2(4) |

|     |     |     |          |     |     |     |          |
|-----|-----|-----|----------|-----|-----|-----|----------|
| C20 | C19 | C18 | 120.7(2) | C26 | C27 | C28 | 120.7(4) |
| C23 | C22 | C21 | 112.6(2) | C23 | C24 | C25 | 121.1(4) |
| C23 | C22 | C29 | 112.5(3) | C25 | C26 | C27 | 119.4(4) |
| C21 | C22 | C29 | 112.0(2) | C29 | C30 | C31 | 120.6(5) |
| C4  | C5  | C6  | 122.1(3) | C29 | C34 | C33 | 120.8(5) |
| N1  | C7  | C6  | 128.6(2) | C39 | C40 | C41 | 119.7(4) |
| C21 | C16 | C17 | 121.1(2) | C32 | C33 | C34 | 120.3(5) |
| C21 | C16 | N1  | 120.1(2) | C40 | C39 | C38 | 120.1(5) |
| C17 | C16 | N1  | 118.8(2) | C33 | C32 | C31 | 119.7(5) |
| C17 | C18 | C19 | 120.5(3) | C32 | C31 | C30 | 120.7(5) |

**Table S6. Torsion Angles for 1.**

| A   | B   | C   | D   | Angle/°   | A   | B   | C   | D    | Angle/°   |
|-----|-----|-----|-----|-----------|-----|-----|-----|------|-----------|
| C43 | C36 | C17 | C18 | -110.5(3) | C29 | C22 | C23 | C28  | 87.4(3)   |
| C37 | C36 | C17 | C18 | 20.1(4)   | C21 | C22 | C23 | C24  | 139.6(3)  |
| C43 | C36 | C17 | C16 | 71.7(3)   | C29 | C22 | C23 | C24  | -92.7(3)  |
| C37 | C36 | C17 | C16 | -157.7(2) | O1  | C1  | C2  | C3   | 175.5(3)  |
| C43 | C36 | C37 | C42 | -158.9(3) | C6  | C1  | C2  | C3   | -6.8(4)   |
| C17 | C36 | C37 | C42 | 71.2(4)   | O1  | C1  | C2  | C8   | -5.2(5)   |
| C43 | C36 | C37 | C38 | 20.0(4)   | C6  | C1  | C2  | C8   | 172.4(3)  |
| C17 | C36 | C37 | C38 | -110.0(4) | C3  | C2  | C8  | C10  | -115.9(4) |
| C37 | C36 | C43 | C48 | 104.0(3)  | C1  | C2  | C8  | C10  | 64.9(4)   |
| C17 | C36 | C43 | C48 | -126.2(3) | C3  | C2  | C8  | C9   | 2.1(5)    |
| C37 | C36 | C43 | C44 | -77.0(3)  | C1  | C2  | C8  | C9   | -177.1(4) |
| C17 | C36 | C43 | C44 | 52.8(4)   | C3  | C2  | C8  | C11  | 121.0(4)  |
| C16 | C21 | C20 | C19 | -1.3(4)   | C1  | C2  | C8  | C11  | -58.2(5)  |
| C22 | C21 | C20 | C19 | 178.6(3)  | C5  | C4  | C12 | C15' | -126.1(8) |
| C35 | O2  | C19 | C20 | 5.6(4)    | C3  | C4  | C12 | C15' | 57.3(8)   |
| C35 | O2  | C19 | C18 | -174.3(3) | C5  | C4  | C12 | C14  | 71.0(7)   |
| C21 | C20 | C19 | O2  | -180.0(3) | C3  | C4  | C12 | C14  | -105.6(7) |
| C21 | C20 | C19 | C18 | 0.0(4)    | C5  | C4  | C12 | C13  | -53.8(6)  |
| C16 | C21 | C22 | C23 | -83.0(3)  | C3  | C4  | C12 | C13  | 129.6(6)  |
| C20 | C21 | C22 | C23 | 97.1(3)   | C5  | C4  | C12 | C15  | -169.7(6) |
| C16 | C21 | C22 | C29 | 149.1(3)  | C3  | C4  | C12 | C15  | 13.7(7)   |
| C20 | C21 | C22 | C29 | -30.8(4)  | C5  | C4  | C12 | C14' | 115.5(7)  |
| C1  | C6  | C5  | C4  | -1.2(4)   | C3  | C4  | C12 | C14' | -61.1(7)  |
| C7  | C6  | C5  | C4  | 173.1(3)  | C5  | C4  | C12 | C13' | 4.0(8)    |
| C16 | N1  | C7  | C6  | 173.6(3)  | C3  | C4  | C12 | C13' | -172.6(7) |
| Ni1 | N1  | C7  | C6  | -6.5(4)   | C45 | C46 | C44 | C43  | 1.6(5)    |

S29

|                 |           |                 |           |
|-----------------|-----------|-----------------|-----------|
| C5 C6 C7 N1     | 177.3(3)  | C48 C43 C44 C46 | -0.6(4)   |
| C1 C6 C7 N1     | -8.4(4)   | C36 C43 C44 C46 | -179.7(3) |
| C20 C21 C16 C17 | 2.3(4)    | C1 C2 C3 C4     | 2.2(5)    |
| C22 C21 C16 C17 | -177.5(2) | C8 C2 C3 C4     | -177.0(3) |
| C20 C21 C16 N1  | 180.0(2)  | C5 C4 C3 C2     | 3.1(5)    |
| C22 C21 C16 N1  | 0.1(4)    | C12 C4 C3 C2    | 179.9(3)  |
| C18 C17 C16 C21 | -2.1(4)   | C24 C23 C28 C27 | -0.3(5)   |
| C36 C17 C16 C21 | 175.8(2)  | C22 C23 C28 C27 | 179.6(3)  |
| C18 C17 C16 N1  | -179.8(2) | C43 C48 C47 C45 | 0.0(5)    |
| C36 C17 C16 N1  | -1.9(3)   | C38 C37 C42 C41 | 0.2(5)    |
| C7 N1 C16 C21   | 82.5(3)   | C36 C37 C42 C41 | 179.1(3)  |
| Ni1 N1 C16 C21  | -97.4(3)  | C44 C46 C45 C47 | -1.7(5)   |
| C7 N1 C16 C17   | -99.8(3)  | C48 C47 C45 C46 | 1.0(5)    |
| Ni1 N1 C16 C17  | 80.3(3)   | C37 C42 C41 C40 | 0.2(6)    |
| C16 C17 C18 C19 | 0.8(4)    | C42 C37 C38 C39 | -0.1(6)   |
| C36 C17 C18 C19 | -177.0(2) | C36 C37 C38 C39 | -179.0(4) |
| O2 C19 C18 C17  | -179.8(3) | C23 C28 C27 C26 | -0.3(6)   |
| C20 C19 C18 C17 | 0.3(4)    | C28 C23 C24 C25 | 0.2(5)    |
| Ni1 O1 C1 C6    | 3.2(4)    | C22 C23 C24 C25 | -179.7(3) |
| Ni1 O1 C1 C2    | -179.3(2) | C26 C25 C24 C23 | 0.4(6)    |
| C5 C6 C1 O1     | -175.9(3) | C24 C25 C26 C27 | -1.0(6)   |
| C7 C6 C1 O1     | 10.1(4)   | C28 C27 C26 C25 | 1.0(6)    |
| C5 C6 C1 C2     | 6.5(4)    | C34 C29 C30 C31 | 1.4(7)    |
| C7 C6 C1 C2     | -167.5(3) | C22 C29 C30 C31 | -179.3(4) |
| C44 C43 C48 C47 | -0.2(4)   | C30 C29 C34 C33 | -1.8(7)   |
| C36 C43 C48 C47 | 178.9(3)  | C22 C29 C34 C33 | 178.9(4)  |
| C23 C22 C29 C30 | -8.1(5)   | C42 C41 C40 C39 | -0.6(7)   |
| C21 C22 C29 C30 | 119.8(4)  | C29 C34 C33 C32 | 1.4(8)    |
| C23 C22 C29 C34 | 171.1(3)  | C41 C40 C39 C38 | 0.7(8)    |
| C21 C22 C29 C34 | -60.9(4)  | C37 C38 C39 C40 | -0.3(8)   |
| C6 C5 C4 C3     | -3.6(4)   | C34 C33 C32 C31 | -0.6(9)   |
| C6 C5 C4 C12    | 179.6(3)  | C33 C32 C31 C30 | 0.2(10)   |
| C21 C22 C23 C28 | -40.3(4)  | C29 C30 C31 C32 | -0.6(9)   |

**Table S7. Hydrogen Atom Coordinates ( $\text{\AA} \times 10^4$ ) and Isotropic Displacement Parameters ( $\text{\AA}^2 \times 10^3$ ) for 1.**

| Atom | <i>x</i> | <i>y</i> | <i>z</i> | U(eq) |
|------|----------|----------|----------|-------|
| H36  | 2776     | 3081     | 5707     | 65    |
| H20  | -1192    | 3562     | 6831     | 68    |

S30

|      |       |      |      |     |
|------|-------|------|------|-----|
| H22  | -995  | 1895 | 6021 | 69  |
| H5   | -1625 | 2924 | 4244 | 67  |
| H7   | -645  | 3073 | 5085 | 59  |
| H18  | 1930  | 4585 | 6503 | 66  |
| H48  | 2851  | 2927 | 4820 | 73  |
| H46  | 799   | 5267 | 4389 | 92  |
| H44  | 1327  | 4917 | 5271 | 79  |
| H35A | -1368 | 4698 | 7244 | 128 |
| H35B | -464  | 5119 | 7694 | 128 |
| H35C | -452  | 4197 | 7646 | 128 |
| H3   | -207  | 1575 | 3209 | 80  |
| H28  | -2695 | 3695 | 5834 | 87  |
| H47  | 2278  | 3271 | 3944 | 92  |
| H42  | 4062  | 3259 | 6573 | 96  |
| H45  | 1220  | 4434 | 3725 | 96  |
| H25  | -4109 | 1711 | 4659 | 114 |
| H41  | 5806  | 3864 | 7022 | 121 |
| H52A | 1658  | 1238 | 6548 | 145 |
| H52B | 1506  | 2154 | 6480 | 145 |
| H52C | 2822  | 1765 | 6499 | 145 |
| H38  | 3648  | 5014 | 5534 | 113 |
| H27  | -4243 | 3941 | 5125 | 106 |
| H24  | -2565 | 1455 | 5361 | 91  |
| H26  | -4926 | 2955 | 4532 | 110 |
| H30  | -3752 | 2356 | 6403 | 125 |
| H34  | -321  | 1763 | 7039 | 134 |
| H11A | 3071  | 1740 | 3779 | 178 |
| H11B | 3640  | 892  | 3869 | 178 |
| H11C | 3131  | 1332 | 4335 | 178 |
| H40  | 6460  | 5049 | 6732 | 134 |
| H33  | -1049 | 1422 | 7823 | 162 |
| H10A | 1662  | 128  | 4414 | 176 |
| H10B | 2232  | -270 | 3948 | 176 |
| H10C | 790   | -146 | 3900 | 176 |
| H9A  | 811   | 492  | 3061 | 196 |
| H9B  | 2261  | 428  | 3100 | 196 |
| H9C  | 1606  | 1251 | 3004 | 196 |
| H39  | 5402  | 5618 | 5984 | 151 |
| H32  | -3111 | 1527 | 7886 | 161 |
| H31  | -4457 | 1997 | 7186 | 167 |

|      |       |      |      |     |
|------|-------|------|------|-----|
| H13A | -3517 | 1935 | 3446 | 182 |
| H13B | -4009 | 2653 | 3087 | 182 |
| H13C | -3438 | 2791 | 3682 | 182 |
| H15A | -1392 | 2174 | 2535 | 184 |
| H15B | -2847 | 2241 | 2435 | 184 |
| H15C | -2207 | 1535 | 2768 | 184 |
| H14A | -1802 | 3735 | 3376 | 199 |
| H14B | -2478 | 3595 | 2795 | 199 |
| H14C | -1048 | 3429 | 2936 | 199 |
| H13D | -3476 | 3055 | 3631 | 182 |
| H13E | -3449 | 3499 | 3092 | 182 |
| H13F | -2422 | 3669 | 3579 | 182 |
| H15D | -2268 | 1537 | 2823 | 184 |
| H15E | -3310 | 2139 | 2599 | 184 |
| H15F | -3374 | 1707 | 3140 | 184 |
| H14D | -1014 | 3497 | 2963 | 199 |
| H14E | -1946 | 3158 | 2488 | 199 |
| H14F | -737  | 2688 | 2706 | 199 |
| H50A | 4130  | 602  | 6517 | 282 |
| H50B | 3962  | -273 | 6319 | 282 |
| H50C | 2943  | 124  | 6609 | 282 |
| H49A | 3518  | 318  | 4950 | 172 |
| H49B | 4483  | -7   | 5419 | 172 |
| H49C | 4414  | 900  | 5299 | 172 |
| H51A | 1125  | -391 | 5754 | 183 |
| H51B | 2293  | -815 | 5590 | 183 |
| H51C | 1444  | -294 | 5176 | 183 |
| H51D | 2557  | 233  | 6660 | 183 |
| H51E | 3118  | -497 | 6400 | 183 |
| H51F | 1688  | -323 | 6277 | 183 |
| H49D | 4736  | 1235 | 5870 | 172 |
| H49E | 4934  | 405  | 6143 | 172 |
| H49F | 4343  | 1095 | 6432 | 172 |
| H50D | 2846  | -686 | 5427 | 282 |
| H50E | 4107  | -245 | 5407 | 282 |
| H50F | 2943  | -55  | 4984 | 282 |

**Table S8. Atomic Occupancy for 1.**

| <b>Atom</b> | <b>Occupancy</b> | <b>Atom</b> | <b>Occupancy</b> | <b>Atom</b> | <b>Occupancy</b> |
|-------------|------------------|-------------|------------------|-------------|------------------|
|-------------|------------------|-------------|------------------|-------------|------------------|



|      |          |      |          |      |          |
|------|----------|------|----------|------|----------|
| C13  | 0.565(5) | H13A | 0.565(5) | H13B | 0.565(5) |
| H13C | 0.565(5) | C15  | 0.565(5) | H15A | 0.565(5) |
| H15B | 0.565(5) | H15C | 0.565(5) | C14  | 0.565(5) |
| H14A | 0.565(5) | H14B | 0.565(5) | H14C | 0.565(5) |
| C13' | 0.435(5) | H13D | 0.435(5) | H13E | 0.435(5) |
| H13F | 0.435(5) | C15' | 0.435(5) | H15D | 0.435(5) |
| H15E | 0.435(5) | H15F | 0.435(5) | C14' | 0.435(5) |
| H14D | 0.435(5) | H14E | 0.435(5) | H14F | 0.435(5) |
| C50  | 0.698(4) | H50A | 0.698(4) | H50B | 0.698(4) |
| H50C | 0.698(4) | C49  | 0.698(4) | H49A | 0.698(4) |
| H49B | 0.698(4) | H49C | 0.698(4) | C51  | 0.698(4) |
| H51A | 0.698(4) | H51B | 0.698(4) | H51C | 0.698(4) |
| C51' | 0.302(4) | H51D | 0.302(4) | H51E | 0.302(4) |
| H51F | 0.302(4) | C49' | 0.302(4) | H49D | 0.302(4) |
| H49E | 0.302(4) | H49F | 0.302(4) | C50' | 0.302(4) |
| H50D | 0.302(4) | H50E | 0.302(4) | H50F | 0.302(4) |

**Table S9.** Crystal data and structure refinement for **[2,4-di-tert-butyl-6-((2,6-di-benzhydryl-4-methoxyphenylimino)methyl)-phenolato]-Ni(II)-methyl(trimethylphosphine)**

| <b>data</b>                  | <b>2</b>                              |
|------------------------------|---------------------------------------|
| Identification code          | HXH-2-19                              |
| Empirical formula            | C <sub>52</sub> H <sub>60</sub> NNiOP |
| Formula weight               | 804.69                                |
| Temperature/K                | 293(2)                                |
| Crystal system               | monoclinic                            |
| Space group                  | P21/n                                 |
| a/Å                          | 10.7570(5)                            |
| b/Å                          | 16.9845(6)                            |
| c/Å                          | 25.3737(10)                           |
| $\alpha$ /°                  | 90                                    |
| $\beta$ /°                   | 97.853(4)                             |
| $\gamma$ /°                  | 90                                    |
| Volume/Å <sup>3</sup>        | 4592.4(3)                             |
| Z                            | 4                                     |
| $\rho$ calcg/cm <sup>3</sup> | 1.164                                 |
| $\mu$ /mm <sup>-1</sup>      | 0.494                                 |
| F(000)                       | 1720.0                                |
| Crystal size/mm <sup>3</sup> | 0.36 × 0.32 × 0.22                    |

|                                                  |                                                                        |
|--------------------------------------------------|------------------------------------------------------------------------|
| Radiation                                        | MoK $\alpha$ ( $\lambda = 0.71073$ )                                   |
| 2 $\Theta$ range for data collection/ $^{\circ}$ | 5.79 to 58.312                                                         |
| Index ranges                                     | -14 $\leq$ h $\leq$ 12, -21 $\leq$ k $\leq$ 20, -30 $\leq$ l $\leq$ 31 |
| Reflections collected                            | 25593                                                                  |
| Independent reflections                          | 10561 [Rint = 0.0372, Rsigma = 0.0602]                                 |
| Data/restraints/parameters                       | 10561/18/522                                                           |
| Goodness-of-fit on F2                            | 1.018                                                                  |
| Final R indexes [ $I \geq 2\sigma(I)$ ]          | R1 = 0.0570, wR2 = 0.1247                                              |
| Final R indexes [all data]                       | R1 = 0.1041, wR2 = 0.1468                                              |
| Largest diff. peak/hole / e $\text{\AA}^{-3}$    | 0.36/-0.32                                                             |

**Table S10. Fractional Atomic Coordinates ( $\times 104$ ) and Equivalent Isotropic Displacement Parameters ( $\text{\AA}^2 \times 103$ ) for 2. Ueq is defined as 1/3 of of the trace of the orthogonalised UIJ tensor.**

| Atom | x          | y          | z          | U(eq)     |
|------|------------|------------|------------|-----------|
| Ni1  | 6644.8(3)  | 1571.1(2)  | 5639.8(2)  | 40.98(12) |
| P1   | 7700.1(9)  | 504.6(5)   | 5763.9(4)  | 65.2(3)   |
| O1   | 6554.7(18) | 1395.2(10) | 4884.8(7)  | 47.0(5)   |
| N1   | 5575(2)    | 2486.5(12) | 5539.9(8)  | 37.8(5)   |
| C22  | 4453(3)    | 2992.7(15) | 6253(1)    | 41.8(6)   |
| C24  | 7503(3)    | 3632.0(15) | 5752.3(11) | 42.1(6)   |
| C20  | 5261(3)    | 4134.3(15) | 6765.7(11) | 45.9(7)   |
| C21  | 4375(3)    | 3550.7(15) | 6652.5(11) | 46.5(7)   |
| C2   | 4863(2)    | 2259.2(14) | 4589.8(10) | 37.3(6)   |
| C26  | 7449(3)    | 3442.4(18) | 4767.1(12) | 51.3(7)   |
| C4   | 5822(3)    | 1473.4(16) | 3950.6(11) | 46.6(7)   |
| C19  | 6251(3)    | 4168.2(15) | 6468.0(11) | 44.5(7)   |
| C25  | 7164(2)    | 3910.3(16) | 5179.8(11) | 44.1(6)   |
| C44  | 2480(3)    | 2524.1(17) | 5680.4(12) | 47.7(7)   |
| C1   | 4883(2)    | 2641.2(15) | 5092.6(10) | 38.4(6)   |
| C6   | 3911(3)    | 2264.8(16) | 3664.6(11) | 46.3(7)   |
| C30  | 6572(3)    | 4625.7(18) | 5053.6(13) | 56.6(8)   |
| C18  | 6372(2)    | 3631.4(14) | 6064.2(10) | 38.4(6)   |
| C7   | 3953(3)    | 2525.1(16) | 4178.5(11) | 44.5(6)   |
| C3   | 5769(2)    | 1690.7(15) | 4495.4(10) | 39.4(6)   |
| C38  | 2960(3)    | 2064.8(17) | 6643.9(12) | 55.7(8)   |
| C5   | 4881(3)    | 1754.3(17) | 3569.3(11) | 50.5(7)   |
| C37  | 3490(3)    | 2332.4(16) | 6142.9(11) | 47.1(7)   |
| C32  | 8647(3)    | 4034.5(18) | 6054.5(12) | 50.3(7)   |
| C17  | 5449(2)    | 3051.2(14) | 5956.3(10) | 37.7(6)   |

|      |          |            |            |           |
|------|----------|------------|------------|-----------|
| C12  | 2901(3)  | 2542.1(19) | 3217.2(12) | 57.9(8)   |
| C23  | 5170(3)  | 4704.1(19) | 7220.7(13) | 64.0(9)   |
| C45  | 1956(3)  | 3268.9(19) | 5609.4(13) | 60.6(8)   |
| C27  | 7148(3)  | 3674(2)    | 4242.3(13) | 68.4(9)   |
| C28  | 6577(3)  | 4386(2)    | 4125.6(14) | 76.1(11)  |
| C49  | 2055(3)  | 1947(2)    | 5314.9(13) | 60.4(8)   |
| C29  | 6289(3)  | 4862(2)    | 4525.2(15) | 69.2(10)  |
| C8   | 6887(3)  | 955(2)     | 3794.1(12) | 65.1(9)   |
| C33  | 9310(3)  | 3656(2)    | 6481.6(13) | 67.7(9)   |
| C48  | 1156(3)  | 2107(3)    | 4889.8(15) | 78.0(11)  |
| C31  | 9090(3)  | 4762(2)    | 5921.4(17) | 80.5(11)  |
| C47  | 659(3)   | 2843(3)    | 4818.1(15) | 76.8(11)  |
| C34  | 10367(4) | 3981(3)    | 6772.0(16) | 87.7(12)  |
| C46  | 1050(3)  | 3423(2)    | 5177.2(16) | 73.3(10)  |
| C9   | 8152(4)  | 1349(3)    | 3986.1(16) | 87.6(12)  |
| C43  | 1695(4)  | 2030(2)    | 6674.6(16) | 87.3(12)  |
| C39  | 3764(4)  | 1827(3)    | 7084.1(16) | 91.6(13)  |
| C10  | 6809(4)  | 134(2)     | 4035.9(16) | 95.4(14)  |
| C40  | 3305(6)  | 1585(3)    | 7548.6(18) | 116.9(19) |
| C11  | 6808(4)  | 848(3)     | 3187.9(14) | 104.4(16) |
| C16  | 6893(4)  | 1676(2)    | 6407.3(13) | 85.8(13)  |
| C42  | 1258(5)  | 1774(3)    | 7138(2)    | 113.8(17) |
| C35  | 10776(4) | 4701(3)    | 6636(2)    | 100.8(15) |
| C41  | 2076(6)  | 1563(3)    | 7572.4(19) | 117.4(19) |
| C51  | 8967(4)  | 409(3)     | 5362(2)    | 113.6(17) |
| C36  | 10144(4) | 5084(3)    | 6214(2)    | 109.3(17) |
| C50  | 6706(5)  | -338(2)    | 5540(2)    | 122.3(19) |
| C52  | 8424(8)  | 168(4)     | 6396(2)    | 212(4)    |
| C13  | 1600(5)  | 2443(5)    | 3393(2)    | 102(2)    |
| C14  | 2862(7)  | 2043(4)    | 2707(3)    | 97(2)     |
| C15  | 3128(8)  | 3383(4)    | 3086(3)    | 114(3)    |
| C13' | 2062(12) | 3247(11)   | 3411(5)    | 102(2)    |
| C15' | 3644(16) | 2952(9)    | 2789(7)    | 114(3)    |
| C14' | 2169(15) | 1877(9)    | 2970(6)    | 97(2)     |

**Table S11. Anisotropic Displacement Parameters ( $\text{\AA}^2 \times 10^3$ ) for 2. The Anisotropic displacement factor exponent takes the form:  $-2\pi^2[h^2a^*2U_{11}+2hka^*b^*U_{12}+\dots]$ .**

| Atom | U11     | U22       | U33       | U23       | U13       | U12      |
|------|---------|-----------|-----------|-----------|-----------|----------|
| Ni1  | 50.6(2) | 38.87(19) | 30.96(19) | -1.13(15) | -3.34(14) | 6.66(15) |

|     |          |          |          |           |           |           |
|-----|----------|----------|----------|-----------|-----------|-----------|
| P1  | 83.4(7)  | 57.6(5)  | 52.1(5)  | 7.8(4)    | 0.6(4)    | 27.6(4)   |
| O1  | 56.6(12) | 49.5(11) | 32.1(10) | -4.8(8)   | -3.8(8)   | 15.4(9)   |
| N1  | 46.2(13) | 35.8(11) | 30.3(12) | -2.1(9)   | 1.2(9)    | 1.5(9)    |
| C22 | 54.1(17) | 36.8(14) | 34.4(15) | 0.1(11)   | 5.7(12)   | 0.7(12)   |
| C24 | 46.7(16) | 39.5(14) | 38.8(15) | -2.4(11)  | 1.2(12)   | 0.6(11)   |
| C20 | 65.7(19) | 40.6(15) | 30.8(15) | -4.5(12)  | 4.3(13)   | 4.9(13)   |
| C21 | 56.4(18) | 46.5(16) | 38.3(16) | -2.4(12)  | 12.7(13)  | 1.0(13)   |
| C2  | 41.2(15) | 38.9(14) | 30.0(13) | -1.7(11)  | -1.4(11)  | 1.2(11)   |
| C26 | 51.3(18) | 58.5(18) | 45.8(17) | 1.4(14)   | 12.4(13)  | 1.8(14)   |
| C4  | 54.8(18) | 51.7(16) | 32.0(15) | -6.0(12)  | 1.5(12)   | 6.2(13)   |
| C19 | 53.6(17) | 37.8(14) | 39.8(16) | -4.0(12)  | -2.0(13)  | -2.4(12)  |
| C25 | 39.2(15) | 51.5(16) | 41.1(16) | 2.0(13)   | 3.7(12)   | -1.0(12)  |
| C44 | 48.5(17) | 50.2(16) | 46.1(17) | 0.8(13)   | 13.2(13)  | -4.0(13)  |
| C1  | 39.6(15) | 36.8(13) | 37.7(15) | -0.8(11)  | 1.9(11)   | 2.8(11)   |
| C6  | 49.8(17) | 50.7(16) | 35.1(15) | 3.4(13)   | -5.6(12)  | -2.4(13)  |
| C30 | 58.2(19) | 59.8(19) | 51.8(19) | 5.4(15)   | 7.7(15)   | 8.5(15)   |
| C18 | 45.7(16) | 37.0(14) | 31.6(14) | 1.1(11)   | 2.1(11)   | 3.5(11)   |
| C7  | 42.6(16) | 46.3(15) | 43.2(16) | 0.4(13)   | 0.2(12)   | 2.5(12)   |
| C3  | 43.7(15) | 40.2(14) | 32.2(14) | -1.7(11)  | -2.6(11)  | 0.5(11)   |
| C38 | 74(2)    | 46.6(17) | 47.1(18) | 2.7(14)   | 8.7(15)   | -14.1(15) |
| C5  | 61.2(19) | 58.7(18) | 29.8(15) | -6.8(13)  | -0.5(13)  | 0.5(14)   |
| C37 | 57.0(18) | 41.2(15) | 43.4(17) | -0.8(13)  | 7.9(13)   | -3.4(13)  |
| C32 | 43.2(16) | 59.4(18) | 47.7(18) | -9.2(14)  | 4.5(13)   | 1.2(14)   |
| C17 | 47.9(16) | 35.1(13) | 28.3(13) | -0.7(11)  | -1.3(11)  | 7.1(11)   |
| C12 | 63(2)    | 68(2)    | 37.0(17) | 5.4(15)   | -10.3(14) | 7.2(16)   |
| C23 | 85(2)    | 62(2)    | 46.0(19) | -18.1(16) | 12.7(16)  | -2.6(17)  |
| C45 | 64(2)    | 61(2)    | 57(2)    | -2.5(16)  | 10.7(16)  | 6.0(16)   |
| C27 | 80(2)    | 84(2)    | 43.4(19) | 2.3(18)   | 19.4(17)  | 0(2)      |
| C28 | 79(3)    | 105(3)   | 44(2)    | 23(2)     | 8.0(17)   | 8(2)      |
| C49 | 62(2)    | 59.5(19) | 58(2)    | -5.8(16)  | 2.1(16)   | -5.4(16)  |
| C29 | 68(2)    | 76(2)    | 64(2)    | 27.3(19)  | 9.8(18)   | 15.5(18)  |
| C8  | 80(2)    | 76(2)    | 38.4(18) | -10.3(16) | 5.6(16)   | 26.2(19)  |
| C33 | 62(2)    | 88(2)    | 50(2)    | -0.6(18)  | -3.5(16)  | -6.6(18)  |
| C48 | 66(2)    | 95(3)    | 69(3)    | -14(2)    | -4.7(19)  | -8(2)     |
| C31 | 68(2)    | 69(2)    | 99(3)    | 4(2)      | -9(2)     | -12.2(19) |
| C47 | 51(2)    | 115(3)   | 62(2)    | 2(2)      | 1.0(17)   | 6(2)      |
| C34 | 67(3)    | 127(4)   | 62(3)    | -19(2)    | -15.5(19) | -1(3)     |
| C46 | 66(2)    | 83(3)    | 72(3)    | 12(2)     | 11.1(19)  | 21.6(19)  |
| C9  | 67(3)    | 121(3)   | 76(3)    | -7(2)     | 16(2)     | 26(2)     |
| C43 | 83(3)    | 113(3)   | 69(3)    | 21(2)     | 23(2)     | -7(2)     |

|      |         |        |          |          |        |        |
|------|---------|--------|----------|----------|--------|--------|
| C39  | 93(3)   | 110(3) | 68(3)    | 37(2)    | -3(2)  | -30(2) |
| C10  | 131(4)  | 71(2)  | 81(3)    | -17(2)   | 3(3)   | 39(2)  |
| C40  | 135(5)  | 136(4) | 71(3)    | 50(3)    | -16(3) | -57(4) |
| C11  | 125(4)  | 143(4) | 45(2)    | -22(2)   | 8(2)   | 62(3)  |
| C16  | 140(4)  | 77(2)  | 35.2(18) | -1.8(17) | -10(2) | 53(2)  |
| C42  | 108(4)  | 159(5) | 82(3)    | 26(3)    | 42(3)  | -22(3) |
| C35  | 63(3)   | 122(4) | 111(4)   | -49(3)   | -11(2) | -16(3) |
| C41  | 161(5)  | 127(4) | 66(3)    | 23(3)    | 22(3)  | -62(4) |
| C51  | 84(3)   | 119(4) | 143(5)   | 22(3)    | 32(3)  | 40(3)  |
| C36  | 87(3)   | 82(3)  | 149(5)   | -7(3)    | -18(3) | -32(2) |
| C50  | 145(5)  | 60(3)  | 170(6)   | 2(3)     | 49(4)  | -3(3)  |
| C52  | 363(11) | 175(6) | 80(4)    | 14(4)    | -35(5) | 182(7) |
| C13  | 60(3)   | 172(6) | 69(3)    | 28(4)    | -14(3) | 23(4)  |
| C14  | 100(5)  | 122(4) | 58(4)    | -10(3)   | -31(3) | 21(4)  |
| C15  | 138(6)  | 90(5)  | 98(5)    | 41(4)    | -39(4) | 8(4)   |
| C13' | 60(3)   | 172(6) | 69(3)    | 28(4)    | -14(3) | 23(4)  |
| C15' | 138(6)  | 90(5)  | 98(5)    | 41(4)    | -39(4) | 8(4)   |
| C14' | 100(5)  | 122(4) | 58(4)    | -10(3)   | -31(3) | 21(4)  |

**Table S12. Bond Lengths for 2.**

| Atom Atom Length/Å |     |            | Atom Atom Length/Å |      |           |
|--------------------|-----|------------|--------------------|------|-----------|
| Ni1                | P1  | 2.1381(9)  | C6                 | C5   | 1.403(4)  |
| Ni1                | O1  | 1.9284(18) | C6                 | C12  | 1.534(4)  |
| Ni1                | N1  | 1.930(2)   | C30                | C29  | 1.393(4)  |
| Ni1                | C16 | 1.937(3)   | C18                | C17  | 1.399(4)  |
| P1                 | C51 | 1.817(4)   | C38                | C37  | 1.531(4)  |
| P1                 | C50 | 1.830(5)   | C38                | C43  | 1.375(5)  |
| P1                 | C52 | 1.780(5)   | C38                | C39  | 1.376(5)  |
| O1                 | C3  | 1.309(3)   | C32                | C33  | 1.373(4)  |
| N1                 | C1  | 1.296(3)   | C32                | C31  | 1.382(5)  |
| N1                 | C17 | 1.447(3)   | C12                | C13  | 1.535(7)  |
| C22                | C21 | 1.399(4)   | C12                | C14  | 1.543(7)  |
| C22                | C37 | 1.526(4)   | C12                | C15  | 1.495(7)  |
| C22                | C17 | 1.394(4)   | C12                | C13' | 1.616(15) |
| C24                | C25 | 1.524(4)   | C12                | C15' | 1.594(17) |
| C24                | C18 | 1.539(4)   | C12                | C14' | 1.467(15) |
| C24                | C32 | 1.521(4)   | C45                | C46  | 1.389(5)  |
| C20                | C21 | 1.378(4)   | C27                | C28  | 1.369(5)  |
| C20                | C19 | 1.388(4)   | C28                | C29  | 1.366(5)  |
| C20                | C23 | 1.520(4)   | C49                | C48  | 1.374(5)  |

|     |     |          |     |     |          |
|-----|-----|----------|-----|-----|----------|
| C2  | C1  | 1.429(3) | C8  | C9  | 1.535(5) |
| C2  | C7  | 1.405(4) | C8  | C10 | 1.531(5) |
| C2  | C3  | 1.415(4) | C8  | C11 | 1.540(4) |
| C26 | C25 | 1.382(4) | C33 | C34 | 1.382(5) |
| C26 | C27 | 1.384(4) | C48 | C47 | 1.362(5) |
| C4  | C3  | 1.439(4) | C31 | C36 | 1.380(5) |
| C4  | C5  | 1.386(4) | C47 | C46 | 1.369(5) |
| C4  | C8  | 1.540(4) | C34 | C35 | 1.360(6) |
| C19 | C18 | 1.391(4) | C43 | C42 | 1.394(5) |
| C25 | C30 | 1.389(4) | C39 | C40 | 1.400(6) |
| C44 | C37 | 1.522(4) | C40 | C41 | 1.333(7) |
| C44 | C45 | 1.387(4) | C42 | C41 | 1.361(7) |
| C44 | C49 | 1.383(4) | C35 | C36 | 1.354(6) |
| C6  | C7  | 1.372(4) |     |     |          |

**Table S13. Bond Angles for 2.**

| Atom Atom Atom Angle/° |     |     |            | Atom Atom Atom Angle/° |     |      |          |
|------------------------|-----|-----|------------|------------------------|-----|------|----------|
| O1                     | Ni1 | P1  | 88.20(6)   | C2                     | C3  | C4   | 117.1(2) |
| O1                     | Ni1 | N1  | 92.64(8)   | C43                    | C38 | C37  | 122.9(3) |
| O1                     | Ni1 | C16 | 173.85(12) | C43                    | C38 | C39  | 117.3(3) |
| N1                     | Ni1 | P1  | 175.37(7)  | C39                    | C38 | C37  | 119.8(3) |
| N1                     | Ni1 | C16 | 93.21(11)  | C4                     | C5  | C6   | 125.6(3) |
| C16                    | Ni1 | P1  | 86.11(10)  | C22                    | C37 | C38  | 112.7(2) |
| C51                    | P1  | Ni1 | 114.66(15) | C44                    | C37 | C22  | 112.3(2) |
| C51                    | P1  | C50 | 101.9(2)   | C44                    | C37 | C38  | 113.3(2) |
| C50                    | P1  | Ni1 | 109.95(16) | C33                    | C32 | C24  | 119.0(3) |
| C52                    | P1  | Ni1 | 124.27(18) | C33                    | C32 | C31  | 116.9(3) |
| C52                    | P1  | C51 | 102.0(3)   | C31                    | C32 | C24  | 124.1(3) |
| C52                    | P1  | C50 | 101.2(3)   | C22                    | C17 | N1   | 120.2(2) |
| C3                     | O1  | Ni1 | 129.06(17) | C22                    | C17 | C18  | 121.4(2) |
| C1                     | N1  | Ni1 | 122.61(18) | C18                    | C17 | N1   | 118.3(2) |
| C1                     | N1  | C17 | 113.9(2)   | C6                     | C12 | C13  | 109.4(3) |
| C17                    | N1  | Ni1 | 123.48(16) | C6                     | C12 | C14  | 112.8(3) |
| C21                    | C22 | C37 | 121.6(2)   | C6                     | C12 | C13' | 111.8(5) |
| C17                    | C22 | C21 | 118.0(2)   | C6                     | C12 | C15' | 105.6(6) |
| C17                    | C22 | C37 | 120.4(2)   | C13                    | C12 | C14  | 105.2(4) |
| C25                    | C24 | C18 | 112.8(2)   | C15                    | C12 | C6   | 109.7(4) |
| C32                    | C24 | C25 | 114.4(2)   | C15                    | C12 | C13  | 110.7(5) |
| C32                    | C24 | C18 | 112.5(2)   | C15                    | C12 | C14  | 108.9(5) |
| C21                    | C20 | C19 | 118.5(2)   | C15'                   | C12 | C13' | 103.6(9) |

|     |     |     |          |      |     |      |          |
|-----|-----|-----|----------|------|-----|------|----------|
| C21 | C20 | C23 | 120.1(3) | C14' | C12 | C6   | 111.3(6) |
| C19 | C20 | C23 | 121.4(3) | C14' | C12 | C13' | 114.3(9) |
| C20 | C21 | C22 | 122.0(3) | C14' | C12 | C15' | 109.6(9) |
| C7  | C2  | C1  | 116.2(2) | C44  | C45 | C46  | 120.2(3) |
| C7  | C2  | C3  | 121.3(2) | C28  | C27 | C26  | 119.9(3) |
| C3  | C2  | C1  | 122.3(2) | C29  | C28 | C27  | 120.2(3) |
| C25 | C26 | C27 | 121.2(3) | C48  | C49 | C44  | 121.3(3) |
| C3  | C4  | C8  | 121.5(2) | C28  | C29 | C30  | 120.1(3) |
| C5  | C4  | C3  | 117.5(2) | C4   | C8  | C11  | 112.6(3) |
| C5  | C4  | C8  | 121.0(3) | C9   | C8  | C4   | 109.2(3) |
| C20 | C19 | C18 | 122.0(3) | C9   | C8  | C11  | 107.1(3) |
| C26 | C25 | C24 | 119.7(2) | C10  | C8  | C4   | 109.5(3) |
| C26 | C25 | C30 | 118.1(3) | C10  | C8  | C9   | 111.4(3) |
| C30 | C25 | C24 | 122.2(3) | C10  | C8  | C11  | 107.1(3) |
| C45 | C44 | C37 | 122.0(3) | C32  | C33 | C34  | 122.3(4) |
| C49 | C44 | C37 | 120.1(3) | C47  | C48 | C49  | 120.5(4) |
| C49 | C44 | C45 | 117.9(3) | C36  | C31 | C32  | 120.6(4) |
| N1  | C1  | C2  | 128.8(2) | C48  | C47 | C46  | 119.5(4) |
| C7  | C6  | C5  | 115.7(2) | C35  | C34 | C33  | 119.6(4) |
| C7  | C6  | C12 | 122.2(3) | C47  | C46 | C45  | 120.6(3) |
| C5  | C6  | C12 | 122.0(3) | C38  | C43 | C42  | 120.8(4) |
| C25 | C30 | C29 | 120.5(3) | C38  | C39 | C40  | 121.0(4) |
| C19 | C18 | C24 | 122.6(2) | C41  | C40 | C39  | 120.8(4) |
| C19 | C18 | C17 | 118.1(2) | C41  | C42 | C43  | 120.6(5) |
| C17 | C18 | C24 | 119.3(2) | C36  | C35 | C34  | 119.2(4) |
| C6  | C7  | C2  | 122.1(3) | C40  | C41 | C42  | 119.4(4) |
| O1  | C3  | C2  | 121.5(2) | C35  | C36 | C31  | 121.4(4) |
| O1  | C3  | C4  | 121.4(2) |      |     |      |          |

**Table S14. Torsion Angles for 2.**

| A   | B   | C   | D   | Angle/°     | A  | B  | C   | D    | Angle/°   |
|-----|-----|-----|-----|-------------|----|----|-----|------|-----------|
| Ni1 | O1  | C3  | C2  | 4.2(4)      | C5 | C4 | C3  | C2   | -8.4(4)   |
| Ni1 | O1  | C3  | C4  | -178.24(19) | C5 | C4 | C8  | C9   | 122.4(3)  |
| Ni1 | N1  | C1  | C2  | -8.0(4)     | C5 | C4 | C8  | C10  | -115.4(3) |
| Ni1 | N1  | C17 | C22 | -96.6(3)    | C5 | C4 | C8  | C11  | 3.6(5)    |
| Ni1 | N1  | C17 | C18 | 81.0(3)     | C5 | C6 | C7  | C2   | -3.9(4)   |
| C24 | C25 | C30 | C29 | 179.4(3)    | C5 | C6 | C12 | C13  | 132.0(4)  |
| C24 | C18 | C17 | N1  | -2.0(3)     | C5 | C6 | C12 | C14  | 15.2(5)   |
| C24 | C18 | C17 | C22 | 175.5(2)    | C5 | C6 | C12 | C15  | -106.4(5) |
| C24 | C32 | C33 | C34 | 179.3(3)    | C5 | C6 | C12 | C13' | -169.1(7) |

C24C32C31C36 -179.4(4)  
C20C19C18C24 -176.4(2)  
C20C19C18C17 0.9(4)  
C21C22C37C44 97.9(3)  
C21C22C37C38 -31.6(4)  
C21C22C17N1 179.8(2)  
C21C22C17C18 2.3(4)  
C21C20C19C18 -0.3(4)  
C26C25C30C29 -0.6(4)  
C26C27C28C29 -0.9(6)  
C19C20C21C22 0.7(4)  
C19C18C17N1 -179.4(2)  
C19C18C17C22 -1.9(4)  
C25C24C18C19 -109.3(3)  
C25C24C18C17 73.5(3)  
C25C24C32C33 -156.1(3)  
C25C24C32C31 22.6(4)  
C25C26C27C28 1.2(5)  
C25C30C29C28 0.9(5)  
C44C45C46C47 0.3(5)  
C44C49C48C47 -0.1(6)  
C1 N1 C17C22 82.2(3)  
C1 N1 C17C18 -100.3(3)  
C1 C2 C7 C6 173.4(3)  
C1 C2 C3 O1 10.8(4)  
C1 C2 C3 C4 -166.9(2)  
C18C24C25C26 -125.9(3)  
C18C24C25C30 54.1(3)  
C18C24C32C33 73.5(3)  
C18C24C32C31 -107.9(3)  
C7 C2 C1 N1 176.2(3)  
C7 C2 C3 O1 -174.5(2)  
C7 C2 C3 C4 7.9(4)  
C7 C6 C5 C4 3.0(4)  
C7 C6 C12C13 -50.8(5)  
C7 C6 C12C14 -167.5(4)  
C7 C6 C12C15 70.8(5)  
C7 C6 C12C13'8.1(8)  
C7 C6 C12C15'120.1(8)  
C7 C6 C12C14' -121.0(8)

C5 C6 C12C15' -57.1(8)  
C5 C6 C12C14' 61.7(8)  
C37C22C21C20 178.0(3)  
C37C22C17N1 0.2(4)  
C37C22C17C18 -177.3(2)  
C37C44C45C46 179.0(3)  
C37C44C49C48 -179.1(3)  
C37C38C43C42 179.3(4)  
C37C38C39C40 179.5(4)  
C32C24C25C26 103.7(3)  
C32C24C25C30 -76.2(3)  
C32C24C18C19 22.0(4)  
C32C24C18C17 -155.3(2)  
C32C33C34C35 0.0(6)  
C32C31C36C35 0.2(7)  
C17N1 C1 C2 173.3(3)  
C17C22C21C20 -1.6(4)  
C17C22C37C44 -82.6(3)  
C17C22C37C38 148.0(3)  
C12C6 C7 C2 178.7(3)  
C12C6 C5 C4 -179.6(3)  
C23C20C21C22 -177.1(3)  
C23C20C19C18 177.4(3)  
C45C44C37C22 -40.8(4)  
C45C44C37C38 88.4(3)  
C45C44C49C48 1.0(5)  
C27C26C25C24 179.6(3)  
C27C26C25C30 -0.5(4)  
C27C28C29C30 -0.2(6)  
C49C44C37C22 139.3(3)  
C49C44C37C38 -91.5(3)  
C49C44C45C46 -1.1(5)  
C49C48C47C46 -0.8(6)  
C8 C4 C3 O1 -6.7(4)  
C8 C4 C3 C2 171.0(3)  
C8 C4 C5 C6 -176.2(3)  
C33C32C31C36 -0.7(6)  
C33C34C35C36 -0.5(7)  
C48C47C46C45 0.6(6)  
C31C32C33C34 0.6(5)



|                 |           |                 |          |
|-----------------|-----------|-----------------|----------|
| C3 C2 C1 N1     | -8.8(4)   | C34 C35 C36 C31 | 0.4(8)   |
| C3 C2 C7 C6     | -1.6(4)   | C43 C38 C37 C22 | 126.8(3) |
| C3 C4 C5 C6     | 3.2(4)    | C43 C38 C37 C44 | -2.2(4)  |
| C3 C4 C8 C9     | -57.0(4)  | C43 C38 C39 C40 | -2.1(6)  |
| C3 C4 C8 C10    | 65.2(4)   | C43 C42 C41 C40 | -1.6(9)  |
| C3 C4 C8 C11    | -175.8(3) | C39 C38 C37 C22 | -54.9(4) |
| C38 C43 C42 C41 | 0.9(8)    | C39 C38 C37 C44 | 176.2(3) |
| C38 C39 C40 C41 | 1.5(8)    | C39 C38 C43 C42 | 0.9(6)   |
| C5 C4 C3 O1     | 173.9(3)  | C39 C40 C41 C42 | 0.4(8)   |

**Table S15. Hydrogen Atom Coordinates ( $\text{\AA}\times 10^4$ ) and Isotropic Displacement Parameters ( $\text{\AA}^2\times 10^3$ ) for 2.**

| Atom | x     | y    | z    | U(eq) |
|------|-------|------|------|-------|
| H24  | 7740  | 3078 | 5727 | 50    |
| H21  | 3704  | 3527 | 6848 | 56    |
| H26  | 7851  | 2963 | 4843 | 62    |
| H19  | 6851  | 4562 | 6541 | 53    |
| H1   | 4324  | 3057 | 5100 | 46    |
| H30  | 6363  | 4949 | 5324 | 68    |
| H7   | 3360  | 2890 | 4257 | 53    |
| H5   | 4894  | 1590 | 3220 | 61    |
| H37  | 3950  | 1880 | 6028 | 57    |
| H23A | 5855  | 5071 | 7245 | 96    |
| H23B | 5208  | 4416 | 7548 | 96    |
| H23C | 4390  | 4985 | 7156 | 96    |
| H45  | 2212  | 3667 | 5852 | 73    |
| H27  | 7333  | 3348 | 3969 | 82    |
| H28  | 6385  | 4545 | 3773 | 91    |
| H49  | 2384  | 1442 | 5358 | 72    |
| H29  | 5903  | 5345 | 4444 | 83    |
| H33  | 9039  | 3163 | 6579 | 81    |
| H48  | 886   | 1710 | 4649 | 94    |
| H31  | 8674  | 5036 | 5633 | 97    |
| H47  | 57    | 2950 | 4527 | 92    |
| H34  | 10795 | 3709 | 7059 | 105   |
| H46  | 705   | 3925 | 5131 | 88    |
| H9A  | 8219  | 1830 | 3793 | 131   |
| H9B  | 8822  | 1001 | 3926 | 131   |
| H9C  | 8208  | 1462 | 4359 | 131   |
| H43  | 1125  | 2179 | 6383 | 105   |

|           |      |      |     |
|-----------|------|------|-----|
| H39 4624  | 1827 | 7073 | 110 |
| H10A 6882 | 176  | 4416 | 143 |
| H10B 7478 | -188 | 3941 | 143 |
| H10C 6018 | -102 | 3902 | 143 |
| H40 3866  | 1439 | 7844 | 140 |
| H11A 6047 | 574  | 3056 | 157 |
| H11B 7516 | 548  | 3109 | 157 |
| H11C 6810 | 1355 | 3020 | 157 |
| H16A 6548 | 1225 | 6563 | 129 |
| H16B 6480 | 2143 | 6506 | 129 |
| H16C 7775 | 1711 | 6533 | 129 |
| H42 399   | 1746 | 7150 | 137 |
| H35 11482 | 4927 | 6830 | 121 |
| H41 1779  | 1404 | 7883 | 141 |
| H51A 8648 | 502  | 4995 | 170 |
| H51B 9311 | -113 | 5401 | 170 |
| H51C 9610 | 786  | 5478 | 170 |
| H36 10426 | 5575 | 6119 | 131 |
| H50A 6147 | -446 | 5796 | 183 |
| H50B 7223 | -791 | 5506 | 183 |
| H50C 6226 | -220 | 5202 | 183 |
| H52A 8999 | 561  | 6555 | 318 |
| H52B 8872 | -311 | 6353 | 318 |
| H52C 7793 | 73   | 6622 | 318 |
| H13A 1469 | 1899 | 3473 | 154 |
| H13B 967  | 2611 | 3112 | 154 |
| H13C 1552 | 2755 | 3705 | 154 |
| H14A 2707 | 1503 | 2787 | 146 |
| H14B 3652 | 2085 | 2572 | 146 |
| H14C 2203 | 2232 | 2444 | 146 |
| H15A 2494 | 3555 | 2806 | 171 |
| H15B 3939 | 3433 | 2972 | 171 |
| H15C 3096 | 3703 | 3396 | 171 |
| H13D 2604 | 3652 | 3577 | 154 |
| H13E 1549 | 3046 | 3662 | 154 |
| H13F 1535 | 3463 | 3110 | 154 |
| H15D 4084 | 3405 | 2946 | 171 |
| H15E 3061 | 3113 | 2488 | 171 |
| H15F 4234 | 2586 | 2676 | 171 |
| H14D 1545 | 2068 | 2693 | 146 |

|           |      |      |     |
|-----------|------|------|-----|
| H14E 1766 | 1610 | 3234 | 146 |
| H14F 2718 | 1518 | 2823 | 146 |

---

**Table S16. Atomic Occupancy for 2.**

| <b>Atom Occupancy</b> | <b>Atom Occupancy</b> | <b>Atom Occupancy</b> |
|-----------------------|-----------------------|-----------------------|
| C13 0.681(4)          | H13A 0.681(4)         | H13B 0.681(4)         |
| H13C 0.681(4)         | C14 0.681(4)          | H14A 0.681(4)         |
| H14B 0.681(4)         | H14C 0.681(4)         | C15 0.681(4)          |
| H15A 0.681(4)         | H15B 0.681(4)         | H15C 0.681(4)         |
| C13' 0.319(4)         | H13D 0.319(4)         | H13E 0.319(4)         |
| H13F 0.319(4)         | C15' 0.319(4)         | H15D 0.319(4)         |
| H15E 0.319(4)         | H15F 0.319(4)         | C14' 0.319(4)         |
| H14D 0.319(4)         | H14E 0.319(4)         | H14F 0.319(4)         |

---
